1 **Full title:** Landscape structure influences avian species diversity in tropical urban mosaics

2 **Short title:** Avian species diversity

3

4 **Authors**

5 Trymore Muderere<sup>1\*</sup>. Amon Murwira<sup>1</sup>. Paradzayi Tagwireyi<sup>1</sup>. Ngoni Chiweshe<sup>2</sup>

6 **Corresponding author\*** Trymore Muderere, Phone +263-775-031-477, Email:

7 [muderere.trymore@gmail.com](mailto:muderere.trymore@gmail.com)

8 <sup>1</sup>Department of Geography and Environmental Science, Centre for Geoinformation Science and  
9 Earth Observation, University of Zimbabwe, P.O Box MP167, Mount Pleasant, Harare,  
10 Zimbabwe

11 <sup>2</sup>Department of Tropical Resource Ecology, University of Zimbabwe, P.O Box MP167, Mount  
12 Pleasant, Harare, Zimbabwe

13

14 **Abstract**

15 In this study, we tested whether urban landscape structure influences avian species diversity  
16 using data for Harare, Zimbabwe. Initially, we quantified landscape structure using  
17 fragmentation indices derived from a 5m resolution SPOT 5 imagery. We collected bird species  
18 data through field-based observations of birds at 35 locations occurring in five land use/land  
19 cover types. We quantified avian species diversity using Barger-Parker, Menhinick and  
20 Simpson's Indices. Regression analysis was used to determine the nature and strength of the  
21 relationships between avian species diversity and fragmentation indices. Results indicated that  
22 woodland specialist avian species are negatively associated with landscape fragmentation, while  
23 grassland specialist and generalist avian species positively responded to patch edge density,  
24 habitat patch size and shape complexity. Overall, our results suggest that changes in landscape  
25 structure due to expansion of built-up areas in tropical urban areas may influence avian species  
26 diversity.

27

28 **Keywords:** landscape fragmentation, SPOT 5, avian species diversity, urban landscape ecology

## 29 Introduction

30 Understanding the factors that influence biodiversity within urban landscapes is fundamental to  
31 the planning and development of biodiversity tolerant cities. In the 21<sup>st</sup> Century, increasing  
32 landscape fragmentation resulting from urban development and transportation infrastructure is  
33 considered a predominant driver of biodiversity loss in tropical ecosystems [1]. Urban  
34 development has a marked impact on the environment [2] as it replaces wildlife habitat with  
35 artificial surfaces that are unsuitable as wildlife habitat e.g., asphalt surfaces [3]. Although urban  
36 areas occupy <3% of the Earth's land surface area [4], their ecological impacts span over large  
37 spatial extents and sometimes beyond the urban boundaries [5]. Thus, understanding biological  
38 diversity-landscape structure (spatial configuration of a given land cover class) relationships is  
39 increasingly becoming critical in urban planning [6]. In urban areas, the expansion of built-up  
40 areas as well as its configuration is hypothesised to have differential but significant impacts on  
41 biodiversity patterns [3], thereby making objective methods for quantifying this phenomena  
42 critical.

43  
44 The quantification of landscape structure in urban landscapes is an important step towards  
45 developing urban growth management plans that promote biological diversity. Thus, the  
46 development of methods for understanding the impact of urban development on biological  
47 diversity in the tropics is critical for biodiversity conservation and enhancement of wildlife  
48 persistence in these ecosystems. Such methods may need to focus on improving the estimates of  
49 landscape structure-biodiversity relationships. Although field measurements are regarded as the  
50 most accurate method of quantifying landscape structure-biodiversity relationships, these  
51 measurements are costly and labour intensive and can only be feasible over smaller scales [7, 8].  
52 In this regard the development of methods that supplement field measurements is important.

53  
54 Developments in Geographic Information Systems (GIS) and satellite remote sensing have made  
55 it possible to quantify landscape structure rapidly [2, 3]. In the past, several studies have  
56 demonstrated the utility of landscape indices derived from satellite remotely sensed GIS data in  
57 estimating landscape-biodiversity relationships across various spatiotemporal scales in temperate  
58 landscapes [9-11]. For example, in a study by Coops et al. [12] satellite-derived landscape  
59 metrics were used to predict bird species richness in Ontario, Canada using the Moderate-  
60 resolution Imaging Spectroradiometer (MODIS) and explained variance ranging between 47 to  
61 75%. Similarly, Guo et al. [10] used a coarse Landsat Thematic Mapper (TM) to estimate avian  
62 species habitat relationships in temperate landscapes of Saskatchewan, Canada and their highest  
63 coefficient of determination ( $R^2$ ) was 53%. Wood et al. [11] compared remotely sensed and field-  
64 measured vegetation structure in predicting avian species density in Wisconsin, USA and  
65 observed that air photo ( $R^2 = 0.54$ ) and Landsat TM satellite image ( $R^2 = 0.52$ ) were better  
66 predictors of avian species density than field-measured vegetation structure ( $R^2 = 0.32$ ). In urban  
67 landscapes, relatively higher resolution imagery could be of use in modelling the relationship  
68 between landscape structure and biodiversity.

69  
70 The availability of high spatial resolution sensors such as SPOT 5 has provided data that could  
71 be used to improve the quantification and mapping of landscape structure indices in urban  
72 landscapes that in turn may allow for improved understanding of landscape structure-biodiversity  
73 relationships. To date, studies that assess the utility of high spatial resolution multispectral

74 imagery such as SPOT 5 in estimating landscape structure-biodiversity relationships in tropical  
75 urban ecosystems remains rudimentary.

76

77 In this study, we tested whether and in what way landscape structure indices derived from  
78 remotely sensed land cover relate with avian species diversity patterns in Harare, Zimbabwe.  
79 Specifically, we tested whether and to what extent avian species diversity respond to constraints  
80 including habitat patch size, habitat shape complexity, and habitat inter-patch distance. We  
81 derived bird species data from field surveys and landscape structure data from high spatial  
82 resolution sensors, i.e. SPOT 5 for Harare, Zimbabwe. We expect differential responses of avian  
83 species diversity to habitat constraints. For example, woodland and grassland specialist avian  
84 species may be negatively related to decrease in habitat patch size, increased shape complexity  
85 and habitat isolation distance. While generalist species will respond positively to changes in  
86 habitat conditions.

87

88

## 89 **Materials and Methods**

### 90 ***Study area***

91 The study was carried out in the Harare Metropolitan province of Zimbabwe (Figure 1). The  
92 Harare metropolitan area is approximately 892km<sup>2</sup> in spatial extent and has a human population  
93 of approximately 2.5 million [13]. The center of the study area, is located at Longitude 31°7'E  
94 and Latitude 17°55'S with an altitude range of 1400-1500m above sea level. The city experience  
95 two distinct seasons i.e., hot wet summers (October – April) and cool dry winters (May –  
96 September). The mean annual rainfall ranges between 800-1000mm, while mean annual  
97 temperature ranges between 25 – 27 °C [14].

98

### 99 **#Insert Figure 1**

100

101 Our own fieldwork showed that the prevalent land use/land cover (LULC) types in the city  
102 include grasslands/pasture and cropland (64.0%), forested (21.0%), urban built-up areas (10.7%),  
103 bare ground (3.8%) and water (0.5%). The forested land cover type is mainly deciduous dry  
104 Miombo woodland dominated by *Brachystegia spiciformis*, *Julbernardia globiflora* and *Uapaca*  
105 *kirkiana* [15]. The bare ground cover type consists of exposed surfaces and area under active  
106 urban development. The water cover type includes impoundments and rivers. The urban built-up  
107 area is made up of impervious surface covering including road networks, industrial areas, high  
108 and low density residential areas. The study site was selected because it represents an ideal  
109 location to study landscape structure-biodiversity relationships in the context of regional and  
110 urban planning. The area is currently undergoing a rapid increase in human population associated  
111 with unguided urban development patterns whose impacts have not been quantified.

112

### 113 ***Quantifying landscape structure***

114 We derived landscape structure data from a 5-m spatial resolution SPOT 5 image of Harare.  
115 Specifically, using Object Based Image Analysis (OBIA) in Trimble eCognition (Trimble,  
116 Munich, German) on a desktop computer, we obtained discrete landscape classes of habitat  
117 patches for avian i.e., (1) forested areas, (2) grasslands as well as (3) built up areas. Overall  
118 mapping accuracy was 89.7%, Kappa coefficient of 84.3% based on 340 sampling test points.  
119 We used the Effective Mesh Size [16, 17], grid mesh (mesh size = 4000m<sup>2</sup>) to characterize the

120 landscape structure in the study area. The 4000m<sup>2</sup> mesh size was used because this represents the  
121 average home range size of typical urban birds [9, 16, 18-21]. We then used the Patch Analyst  
122 tool [22] in ArcGIS 10.2 (Environmental Systems Research Institute, Redlands, California,  
123 USA) following Tagwireyi and Sullivan [23] to quantify landscape structure (configuration and  
124 composition) based on 16 landscape patch metrics default in the Patch Analyst tool and 2  
125 Effective Mesh Size landscape patch metrics default in the Effective Mesh Size tool [16, 17]. We  
126 tested the 18 patch metrics for multi-collinearity with pairwise Pearson's correlation [24] and  
127 removed all metrics with  $R^2 > 0.90$  from further analysis following Graham [25]. Patch metrics  
128 were highly variable across landscape classes (SI 1).

129

### 130 *Sampling design*

131 In a GIS, we processed the study area into a LULC categories layer representing three LULC  
132 types i.e., low urbanization grasslands, low urbanization forested area and built-up areas (Table  
133 1). Subcategories were defined for each category to account for variations each context  
134 presented. Altogether we had seven LULC subcategories and representing three LULC types and  
135 35 transect sampling sites (Table 1).

136

### 137 **#Insert Table 1**

138

139 Using the LULC categories base map and the Random Sampling Tool in Quantum GIS 2.6.1  
140 (QGIS Development Team, Switzerland) we stratified the study area (excluding private and  
141 security areas e.g., military and airport land) into five sampling sites for each LULC subcategory  
142 (total 35 sites) (Table 1). We deemed the sample of 35 sites representative for statistical purposes  
143 following Rawlings et al. [24]. Each of the points was used as the center of the 600m transect  
144 lines along which we surveyed the birds. The sampling sites were positioned at least 1.5  
145 kilometers apart to ensure spatial independence between surveyed avian species and on different  
146 land cover types to account for habitat variation within sites [26].

147

### 148 *Avian species surveys*

149 At each sampling site we recorded observations of diurnal-active birds using an effective  
150 detection distance of 50m [27] along either side of the 600m sampling lines. The surveys were  
151 done at four different times of the day i.e. between: 6am-9am; 9am-12pm; 12pm-3pm; 3pm-6pm  
152 during the summer months of February and April 2015 (hot-wet season), to account for  
153 differences in avian species behavior on different times of the day [20, 28]. On each visit, the  
154 same observers waited for about five minutes to allow avian species to resume normal activity  
155 following MacArthur and MacArthur [28] and then recorded all avian species seen perched,  
156 flying or foraging within a 50m distance from the 600m transect line (see SI 1). We identified the  
157 birds to species level based on expert knowledge and a field guide book i.e., Roberts Birds of  
158 Southern Africa [29]. We also categorized avian species into three ecological guilds (generalists,  
159 woodland specialists as well as grassland specialists) because we investigated landscape  
160 influence on the birds at guild level.

161 Avian species were selected as the model species, because they are highly mobile and can  
162 respond to landscape change quickly than ground dwelling mammals or other rarely seen species  
163 [9] which makes birds useful indicators of species responses to urban development induced  
164 environmental change. The study focused on overall avian species than select target species,  
165 common in many studies [30]. The advantage of focusing on overall avian species is that it

166 allows the study to account for avian species with different life histories and behaviors [18, 30,  
167 31].

168

### 169 ***Quantifying avian species diversity***

170 We used the Menhinick, Berger-Parker and Simpson's indices to quantify avian species diversity  
171 [9, 32, 33] (Table 2). A diversity index is a mathematical measure of biodiversity providing  
172 important information about rarity and commonness of a species in a community [33]. We  
173 calculated Menhinick's Index as  $1-(S/\sqrt{N})$  where  $N$ = the number of individuals in a sample and  $S$   
174 = the number of species recorded [34]. The Berger-Parker Index was estimated as  $1-N_{\max}/N$ ,  
175 where  $N_{\max}$  is the number of individuals in the most abundant species and  $N$  is the total number  
176 of individuals in a sample [32]. The Simpson's Index was estimated as  $1-\sum P_i^2$ , where  $P_i^2$  is the  
177 total number of organisms of each particular species from the total number of organisms of all  
178 species [33]. We chose the Menhinick, Berger-Parker and Simpson's Indices because they are  
179 spatially and temporarily stable, robust and biologically intuitive measures of biodiversity [34],  
180 although they remain susceptible to sampling size [33, 35]. We applied the reciprocal 1-D to the  
181 indices so that an increase in the index accompanies an increase in diversity for ease of intuitive  
182 interpretation following Whittaker [36] and Magurran [34].

183

### 184 ***Relating landscape fragmentation indices to avian species diversity***

185 Prior to regression analysis we tested the avian species data for normality using the Kolmogorov-  
186 Smirnov test to test [37] for conformity to the simple regression assumption for randomness and  
187 we found a normal distribution ( $p>0.05$ ). We then used simple regression analysis to examine the  
188 direction and strength of the relationship between fragmentation indices (independent variables)  
189 and avian species diversity (dependent variables) in MS Excel and Statistical Package for Social  
190 Science Version 18 [38]. The strength of each regression model was evaluated based on the  
191 coefficient of determination ( $R^2$ ) and the level of significance ( $p$ -value).

192

## 193 **Results**

### 194 ***Avian species diversity-landscape structure relationships***

195 We surveyed 6081 birds representing 69 species in 35, 600m transects. Thirty percent of the  
196 surveyed birds were observed in low urbanization grassland habitat, 46% in built-up areas and  
197 24% in low urbanization forested land. We also observed that bird species abundance, richness  
198 and diversity (i.e., Menhinick's, Berger-Parker and Simpson's Indices) varies across the three  
199 LULC classes (Table 2).

200

### 201 **#Insert Table 2**

202

### 203 ***Woodland specialist avian species - landscape structure relationships***

204 Simple regression showed that woodland specialist avian species were negatively associated with  
205 patch metrics derived from low urbanization forested cover type, specifically shape complexity  
206 ( $R^2 = 0.635$ ), shape size ( $R^2 = 0.616$ ) and isolation distance ( $R^2 = 0.778$ ) (Figure 2).

207

### 208 **#Insert Figure 2(a),(b),(c).**

209

### 210 ***Grassland specialist avian species - landscape structure relationships***

211 Simple regression showed that grassland specialist avian species had a strong positive  
212 polynomial relationship with patch edge derived from low urbanization grassland cover type ( $R^2$   
213 = 473, Figure 3) and not significant ( $p > 0.05$ ) association with patch size and isolation distance.

214

215 **#Insert Figure 3**

216

### 217 ***Generalist avian species - landscape structure relationships***

218 Simple regression showed significant ( $p < 0.05$ ) positive regression between generalist avian  
219 species and habitat fragment size, shape complexity ( $R^2 = 0.553$ ,  $R^2 = 0.728$ ) (Figure 4) but not  
220 significant relationship with isolation distance of the intensely built-up cover type.

221

222 **#Insert Figure 4(a),(b)**

223

### 224 **Discussion**

225 Results of this study indicate that landscape structure elements influence avian species diversity  
226 in the study area. These results are consistent with our initial hypothesis that landscape structure  
227 influences avian species diversity in urban landscapes. The results are also consistent with  
228 findings of previous studies in urban and non-urban landscapes of North America [e.g., 39],  
229 Central Europe [e.g., 18] and Australia [e.g., 40] who observed that landscape constraints  
230 operating at habitat level influence avian species diversity.

231

232 Results also indicated that avian species diversity of woodland specialists negatively correlated  
233 with edge density of the low urbanization forested cover type, suggesting that for these specialist  
234 avian species increased fragmentation in woodlands due to urban development has negative  
235 impacts on them. This is not surprising as McWilliam and Brown [39] also observed similar  
236 responses in Ontario, Canada where a decrease in forest cover size accompanied by an increase  
237 in the size of built-up area caused decline in the diversity of forest interior specialist species over  
238 a ten-year period. Rodwald and Yahner [41] also observed linkages between landscape  
239 composition and avian community structure in central Pennsylvania, USA. However, the result is  
240 significant in informing urban planning practices that may need to preserve woodland specialist  
241 species. We therefore deduce that landscape metrics derived from high resolution imagery can be  
242 used for accurate estimation of avian species diversity in urban landscapes. In contrast, but not  
243 surprising, results also indicated that grassland specialist avian species positively correlated well  
244 with habitat shape complexity especially high edge effects. These results suggest that while  
245 woodland specialists are negatively affected by woodland fragmentation, this process facilitates  
246 grassland avian species expansion. Again this result is consistent with Jones and Bock [42] who  
247 reported that open spaces typically low urbanization grassland areas can sustain a high diversity  
248 of grassland avian species. Although this is not surprising this result is important for aiding urban  
249 planning practices that may need to conserve various bird species with different habitat  
250 preferences.

251

252 The observation that generalist avian species diversity positively correlates with landscape  
253 fragmentation also suggest that generalist bird species benefit from forest loss and fragmentation.  
254 This is consistent with previous studies from Central Europe [e.g., 21, 35, 43] and North  
255 America [e.g., 6, 18, 31, 44] which link the behavioral traits of generalist avian species to  
256 ubiquitous opportunities presented by intensely built-up landscapes.

257

258 Overall, this study provides evidence that high resolution satellite imagery offer improved  
259 opportunities for estimating the effect of urban development on biodiversity in particular avian  
260 species diversity. The best model explained 79% variation in avian species diversity. This  
261 coefficient of determination is higher than obtained by Coops et al. [12] and Guo et al. [10] across  
262 various spatiotemporal scales in temperate landscapes. Coops et al. [12] used a number of  
263 vegetation indices derived from MODIS to predict breeding bird species richness in Ontario,  
264 Canada and their highest coefficient of determination ( $R^2$ ) was 75%. Guo et al. [10] and Wood et  
265 al. [11] on the other hand found weak to average relationships between landscape spectral  
266 vegetation indices and avian species diversity derived from a coarse Air photo and Landsat  
267 Thematic Mapper (TM) to estimate avian species habitat relationships in temperate landscapes of  
268 Saskatchewan, Canada and Wisconsin, USA respectively and their highest coefficient of  
269 determination ( $R^2$ ) was 54%.

270  
271 This study differs from previous studies in three main ways. Firstly, studies that have used  
272 vegetation to estimate avian species diversity in the temperate regions have used medium to low  
273 spatial resolution imagery data such as Aerial, Landsat and MODIS images. These factors have  
274 resulted in weak relationships, high errors and uncertainties. However, our study estimated avian  
275 species diversity from landscape metrics derived from high spatial resolution satellite imagery  
276 with very low error margins. Thus, it is important to note that integrating landscape metrics  
277 derived from high spatial resolution satellite imagery improved avian species prediction  
278 compared to previous studies. Secondly, there is paucity in studies conducted in tropical  
279 ecosystems that relate landscape metrics to avian species diversity in urban landscapes yet avian  
280 species diversity is a biodiversity indicator that has important insights to the science of urban  
281 environmental change. Finally, unlike previous studies that only determined the relationships  
282 between vegetation indices and avian species diversity we quantified landscape structure  
283 attributes in terms of size, shape and isolation distance at a fine spatial scale. Again, we find this  
284 especially important in African tropical urban landscapes where tree cover is low, much of the  
285 built-up areas have no tarmac cover and much of the urban development is informal and poorly  
286 planned, thus making high spatial resolution satellite imagery an excellent alternative to  
287 delineating spatial variability habitat fragmentation. However, it will be useful to test the  
288 applicability of these models in independent study sites to observe whether the form of remotely  
289 sensed models of landscape metrics are consistent and can be improved further. Nevertheless, we  
290 make a claim that this finding provides an opportunity to quantifying the impact of urban  
291 landscape pattern on biodiversity in tropical urban landscapes of sub-Saharan Africa.

## 292 293 **Conclusion**

294 The main objective of this study was to test whether and to what extent avian species respond to  
295 constraints including habitat fragment size, shape complexity and isolation distance in urbanizing  
296 tropical ecosystems. From the results of this study, we conclude that the:

- 297 1. size, shape and isolation distance of habitat fragments matter to woodland specialist avian  
298 species;
- 299 2. shape of habitat fragments matter to grassland specialist species, than isolation and size  
300 of grassland fragments; and
- 301 3. the increasing complexity of habitat fragment shape and size increases the diversity of  
302 generalist species than isolation.

303 We therefore conclude that urban planning can improve biodiversity in urban landscapes by  
304 managing the size, shape and isolation distance of habitat fragments. Such approaches to urban

305 development can create conditions suitable for avian species persistence in urban landscapes.  
306 Large, regular shaped and interconnected habitat fragments are also fundamental to the  
307 conservation of avian species in urban landscapes. Future urban development strategies should  
308 therefore consider habitat conditions necessary for species persistence, by managing the size,  
309 shape and isolation distance of undeveloped grassland and forested areas in urban ecosystems.  
310 We suggest further studies that aim to assess the variation of avian species diversity in relation to  
311 land use, primary productivity, climatic and topographic variables to assess the pattern of the  
312 distribution and assess whether or not further improvements for estimating biodiversity impacts  
313 of urban development can be achieved.

314

### 315 **Acknowledgements**

316 We are grateful to Anna Zivumbwa for support in the field.

### 317 **Author Contributions**

318 Conceived and designed the study: AM, PT, TM, and NC. Collected the data: TM, PT, NC

319 Analyzed the data: TM. Wrote the manuscript: TM with contributions from AM, PT and NC.

320



322 **References**

- 323 1. Sushinsky, J.R., et al., *How should we grow cities to minimise their biodiversity impacts?* Global  
324 Change Biology, 2013. **19**: p. 401-410.
- 325 2. Richter, M., et al., *Quantifying Spatiotemporal Patterns and Ecological Effects of Urbanization: A*  
326 *Multiscale Landscape Approach*, in *Applied Urban Ecology: A Global Framework*, M. Richter and  
327 U. Weiland, Editors. 2011, John Wiley & Sons, Ltd: Chichester. p. 35 - 49.
- 328 3. Alberti, M., *Advances in Urban Ecology: Integrating Humans and Ecological Processes in Urban*  
329 *Ecosystems*. 2009, Washington DC: Springer.
- 330 4. Schneider, A., M.A. Friedl, and D. Potere, *A new map of global urban extent from MODIS satellite*  
331 *data*. Environmental Research Letters, 2009. **4**: p. 1-11.
- 332 5. Rees, W. and M. Wackernagel, *Urban Ecological Footprints: Why Cities Cannot be Sustainable—*  
333 *and Why They are a Key to Sustainability*, in *Urban Ecology: An International Perspective on the*  
334 *Interaction Between Humans and Nature*, J.M. Marzluff, et al., Editors. 2008, Springer US: New  
335 York.
- 336 6. Leitão, A.B., et al., *Measuring Landscapes: A Planner's Handbook*. 2006, Washington: Island  
337 Press.
- 338 7. Kitzes, J. and R. Shirley, *Estimating biodiversity impacts without field surveys: A case study in*  
339 *northern Borneo*. AMBIO: A Journal of the Human Environment, 2016. **45**(1): p. 110–119.
- 340 8. Turner, W., et al., *Remote sensing for biodiversity science and conservation*. Trends in Ecology  
341 and Evolution, 2003. **18**(6): p. 306–314.
- 342 9. Rocchini, D., J.L. Hernandez-Stefanoni, and K.S. He, *Advancing species diversity estimate by*  
343 *remotely sensed proxies: A conceptual review*. Ecological Informatics, 2015. **25**: p. 22-28.
- 344 10. Guo, X., et al., *Monitoring grassland health with remote sensing approaches*. Prairie  
345 Perspectives, 2012: p. 11-22.
- 346 11. Wood, E.M., et al., *Image Texture Predicts Avian Density and Species Richness*. PLoS One., 2013.  
347 **8**(5).
- 348 12. Coops, N.C., M.A. Wulder, and D. Iwanicka, *Exploring the relative importance of satellite-derived*  
349 *descriptors of production topography and land cover for predicting breeding bird species richness*  
350 *over Ontario, Canada*. Remote Sensing of Environment, 2009. **113**: p. 668-679.
- 351 13. Zimstats, *Population Census National Report 2012*. 2012, Population Census Office Harare.
- 352 14. Unganai, L.S., *Historic and future climatic change in Zimbabwe*. Climate Research 1996. **6**: : p.  
353 137-145.
- 354 15. Mutowo, G. and A. Murwira, *The spatial prediction of tree species diversity in savanna*  
355 *woodlands of Southern Africa*. Geocarto International, 2012. **27**(8): p. 627-645.
- 356 16. Jaeger, J.A.G., *Landscape division, spitting index, and effective mesh size: New measures of*  
357 *landscape fragmentation*. Landsc Ecology, 2000. **15**(2): p. 115-130.
- 358 17. Girvetz, E.H., et al., *Integration of landscape fragmentation analysis into regional planning: A*  
359 *statewide multi-scale case study from California, USA*. Landscape and Urban Planning, 2008.  
360 **86**(3-4): p. 205–218.
- 361 18. McKinney, M.L., *Effects of urbanization on species richness: A review of plants and animals*.  
362 Urban Ecosystems 2008. **11**(2): p. 161-176.
- 363 19. Fahrig, L., *Rethinking patch size and isolation effects: the habitat amount hypothesis* Journal of  
364 Biogeography, 2013. **40**: p. 1649-1663.
- 365 20. Ferenc, M., V. Sedláček, and R. Fuchs, *How to improve urban greenspace for woodland birds: site*  
366 *and localscale determinants of bird species richness*. Urban Ecosystems, 2014. **17**(2): p. 625-640.
- 367 21. Jaeger, J.A.G., et al., *Predicting when animal populations are at risk form roads: an interactive*  
368 *model of road avoidance behaviour*. Ecological Modelling 2005. **185**(2-4): p. 179-184.

- 369 22. McGarigal, K. and B.J. Marks, *FRAGSTATS: spatial pattern analysis program for quantifying*  
370 *landscape structure*. 1995, US For Serv Gen Tech Rep PNW-GTR-351.
- 371 23. Tagwireyi, P. and S.M.P. Sullivan, *Riverine Landscape Patch Heterogeneity Drives Riparian Ant*  
372 *Assemblages in the Scioto River Basin, USA*. PLoS ONE, 2015. **10**(4).
- 373 24. Rawlings, J.O., S.G. Pantula, and D.A. Dickey, *Applied Regression Analysis* 1998, New York:  
374 Springer
- 375 25. Graham., M.H., *Confronting multicollinearity in ecological multiple regression*. Ecology 2003.  
376 **84**(11): p. 2809-2815
- 377 26. Schindler, S., et al., *Multiscale performance of landscape metrics as indicators of species richness*  
378 *of plants, insects and vertebrates*. Ecological Indicators 2013. **31**: p. 41–48.
- 379 27. Scott, M.J., P.J. Heglund, and M.L. Morrison, *Predicting species occurrences: Issues of accuracy*  
380 *and scale*. 2002, Washington: Island Press.
- 381 28. MacArthur, R.H. and J.W. MacArthur, *On bird species diversity*. Ecology, 1961. **42**(3): p. 594-598.
- 382 29. van Perlo, B., *Birds of Southern Africa: Field Guide*. 2009, Princeton: Princeton University Press.
- 383 30. Magle, S.B., D.M. Theobald, and K.R. Crooks, *A comparison of metrics predicting landscape*  
384 *connectivity for a highly interactive species along an urban gradient in Colorado, USA*. Landsc  
385 Ecology, 2009. **24**(2): p. 267-280.
- 386 31. Magle, S.B., et al., *Urban wildlife research: past, present, and future*. Biological Conservation,  
387 2012. **155**: p. 23-32.
- 388 32. Berger, W.H. and F.L. Parker, *Diversity of planktonic Foraminifera in deep sea sediments* Science,  
389 1970. **168**: p. 1345-1347.
- 390 33. Rosenzweig, M.L., *Species Diversity in Space and Time*. 1995, New York: Cambridge University  
391 Space.
- 392 34. Magurran, A.E., *Measuring Biological Diversity*. 2005, Oxford: Blackwell Publishing.
- 393 35. Walz, U., *Landscape structure, landscape metrics and biodiversity*. Living Reviews in Landscape  
394 Research, 2011. **5**(3): p. 5-16.
- 395 36. Whittaker, R.H., *Evolution of species diversity in land communities* Evolutionary Biology, 1977.  
396 **10**: p. 1-67.
- 397 37. Aron, A. and E.N. Aron, *Statistics for behavioral and social sciences: A brief Course*. Second  
398 Edition ed. 2002, London: Prentice Hall.
- 399 38. SPSS.Inc., *SPSS for Windows, Version 16.0*. 2007, Chicago: SPSS Inc.
- 400 39. McWilliam, W.J. and R.D. Brown, *Effects of Housing Development on Bird Species Diversity in a*  
401 *Forest Fragment in Ontario, Canada*. Landscape Research, 2001. **26**(4): p. 407-419.
- 402 40. FitzGibbon, S.I., D.A. Putland, and A.W. Goldizen, *The importance of functional connectivity in*  
403 *the conservation of a ground-dwelling mammal in an urban Australian landscape*. Landsc  
404 Ecology, 2007. **22**(10): p. 1513-1525.
- 405 41. Rodewald, A.D. and R.H.J.E. Yahner, *Influence of landscape composition on avian community*  
406 *structure and associated mechanisms*. 2001. **82**(12): p. 3493-3504.
- 407 42. Jones, Z.F. and C.E. Bock, *Conservation of Grassland Birds in an Urbanizing Landscape: A*  
408 *Historical Perspective* The Condor 2002. **104**(3): p. 643-651
- 409 43. Jaeger, J.A.G., et al., *Implementing Landscape Fragmentation as an Indicator in the Swiss*  
410 *Monitoring System of Sustainable Development (MONET)*. Journal of Environmental  
411 Management, 2008. **88**: p. 737–751.
- 412 44. Nilon, C., *A study of Biodiversity in the World's Cities*, in *The Nature of Cities*. 2014.

413

414

416 **Tables**

417 Table 1. Study sites sampling design matrix and definitions of land cover/land use types

| <b>Land Cover/Use Type</b>      | <b>Subcategory</b> | <b>Description</b>                               | <b>Transects</b> |
|---------------------------------|--------------------|--------------------------------------------------|------------------|
| Low urbanization grasslands     | 1                  | Grasslands in Low Density Residential Areas      | 5                |
|                                 | 2                  | Grasslands in High Density Residential Areas     | 5                |
| Low urbanization forested areas | 3                  | Forested areas in Low Density Residential Areas  | 5                |
|                                 | 4                  | Forested areas in High Density Residential Areas | 5                |
| Built-up area:                  | 5                  | Low Density Residential Areas                    | 5                |
|                                 | 6                  | High Density Residential Areas                   | 5                |
|                                 | 7                  | Central Business Districts and Industrial Areas  | 5                |

418

419

420 Table 2. Summary statistics of bird species observed by landscape type

| <b>Land use/cover class</b> | <b>Abundance</b> | <b>Richness</b> | <b>Menhinick's Index</b> | <b>Berger-Parker Index</b> | <b>Simpson's Index</b> |
|-----------------------------|------------------|-----------------|--------------------------|----------------------------|------------------------|
| Low urbanization forested   | 1286.00          | 25.00±36.00     | 2.45±2.88                | 0.78±0.86                  | 0.90±0.93              |
| Low urbanization grasslands | 1980.00          | 28.87±11.21     | 1.64±0.34                | 0.14±0.82                  | 0.80±0.90              |
| Built-up Area               | 2815.00          | 18.13±11.68     | 1.60±2.29                | 0.70±0.15                  | 0.95±0.06              |

421

422

423

425 **Figure captions**

426 **Figure 1.** Map of the study area showing the 35 bird observation sites georeferenced in WGS84  
427 and the coordinates are in Decimal Degrees

428 **Figure 2.** Relationship between woodland specialist avian species diversity (Menhinick's,  
429 Berger-Parker's Indexes) and landscape structure (a = size, b= shape, c = isolation distance)  
430

431 **Figure 3.** Relationship between grassland specialist avian species diversity and landscape  
432 structure (shape)  
433

434 **Figure 4.** Relationship between generalist avian species diversity and landscape structure (a=  
435 size, b= shape)  
436

438 **Supplementary information**

439

440 **SS 1: Descriptive statistics of the patch metrics by land use/land cover type**

| <b>Patch metrics</b>     | <b>Forested</b> |            |             |           | <b>Grasslands</b> |            |             |           | <b>Built-up area</b> |            |             |           |
|--------------------------|-----------------|------------|-------------|-----------|-------------------|------------|-------------|-----------|----------------------|------------|-------------|-----------|
|                          | <i>Min</i>      | <i>Max</i> | <i>Mean</i> | <i>SD</i> | <i>Min</i>        | <i>Max</i> | <i>Mean</i> | <i>SD</i> | <i>Min</i>           | <i>Max</i> | <i>Mean</i> | <i>SD</i> |
| <i>Size Metrics</i>      |                 |            |             |           |                   |            |             |           |                      |            |             |           |
| <i>Meff</i> CUT          | 0.01            | 1.70       | 0.61        | 0.58      | 0.05              | 0.63       | 0.33        | 0.21      | 0.00                 | 0.21       | 0.10        | 0.07      |
| <i>Meff</i> CBC          | 0.14            | 15.58      | 4.38        | 5.17      | 0.06              | 4.98       | 1.07        | 1.45      | 0.10                 | 0.21       | 0.25        | 0.35      |
| PLAND                    | 0.23            | 0.91       | 0.66        | 0.18      | 12.83             | 20.04      | 17.92       | 2.65      | 1.57                 | 11.63      | 6.31        | 3.79      |
| NUMB                     | 4.00            | 127.00     | 42.30       | 40.06     | 9.00              | 226.00     | 67.4        | 2.65      | 108.00               | 400.00     | 288.33      | 96.81     |
| MPS                      | 2.54            | 197.20     | 68.63       | 67.80     | 2.49              | 86.49      | 26.27       | 25.11     | 0.20                 | 4.31       | 0.23        | 1.28      |
| MEDPS                    | 0.38            | 1.76       | 0.83        | 0.39      | 0.15              | 1.20       | 0.38        | 0.32      | 0.13                 | 0.45       | 0.30        | 0.09      |
| PSCOV                    | 171.9           | 835.84     | 446.05      | 197.66    | 278.24            | 785.23     | 552.5       | 160.95    | 110.12               | 770.14     | 369.09      | 242.05    |
| PSSD                     | 8.5             | 638.14     | 227.39      | 200.91    | 17.03             | 240.64     | 113.8       | 69.26     | 0.22                 | 33.19      | 0.37        | 10.25     |
| <i>Shape Metrics</i>     |                 |            |             |           |                   |            |             |           |                      |            |             |           |
| ED                       | 0.02            | 0.12       | 0.05        | 0.03      | 0.02              | 0.12       | 0.05        | 0.03      | 0.11                 | 0.33       | 0.20        | 0.06      |
| TE                       | 19.88           | 117.6      | 45.65       | 33.69     | 16.4              | 66.88      | 34.64       | 15.57     | 20.52                | 73.33      | 42.45       | 17.18     |
| MPE                      | 0.29            | 4.97       | 2.25        | 1.82      | 0.26              | 1.82       | 0.89        | 0.55      | 0.07                 | 0.50       | 0.23        | 0.15      |
| MSI                      | 1.73            | 2.73       | 2.09        | 0.34      | 1.56              | 2.26       | 1.84        | 0.22      | 1.39                 | 1.91       | 1.64        | 0.15      |
| MPAR                     | 0.17            | 0.35       | 0.25        | 0.06      | 0.18              | 0.44       | 0.35        | 0.08      | 0.27                 | 0.45       | 0.34        | 0.05      |
| MSPFD                    | 1.49            | 1.61       | 1.55        | 0.04      | 1.49              | 1.67       | 1.61        | 0.05      | 1.56                 | 1.66       | 1.6         | 0.03      |
| AWMSI                    | 3.44            | 18.68      | 8.82        | 4.74      | 4.17              | 14.39      | 7.17        | 2.91      | 1.52                 | 12.54      | 5.02        | 4.31      |
| AWMPFD                   | 1.45            | 1.57       | 1.51        | 0.04      | 1.42              | 1.59       | 1.50        | 0.05      | 1.53                 | 1.65       | 1.58        | 0.04      |
| <i>Isolation Metrics</i> |                 |            |             |           |                   |            |             |           |                      |            |             |           |
| PI                       | 0.67            | 2.38       | 1.22        | 0.51      | 0.69              | 1.38       | 0.90        | 0.21      | 0.76                 | 1.32       | 1.08        | 0.17      |
| OMD                      | 35.8            | 265.32     | 126.33      | 77.44     | 32.79             | 95.48      | 62.7        | 22.88     | 39.59                | 119.35     | 74.22       | 24.1      |

441

442 Note that values for PSSD, MEDPS, MPS, MPE and TE were scaled down by a factor of 1,000. Where: Effective Mesh Size CUT  
 443 (*Meff* CUT), Effective Mesh Size CBC (*Meff* CBC), Percent Landscape Area (PLAND), Number of Patches (NUMB), Mean  
 444 Patch Size (MPS), Median Patch Size (MEDPS), Patch Size Coefficient of Variation (PSCOV), Patch Size Standard Deviation  
 445 (PSSD), Edge Density (ED), Total Edge (TE), Mean Patch Edge (MPE), Mean Shape Index (MSI), Mean Perimeter Area Ratio  
 446 (MPAR), Mean Shape Patch Fractal Dimension (MSPFD), Area Weighted Mean Shape Index (AWMSI), Area Weighted Mean  
 447 Patch Fractal Dimension (AWMPFD), Proximity Index (PI), Observed Mean Distance (OMD).

448

450 **SS2:** List of avian species recorded in the Harare Metropolitan Region

| <i>Common Name</i>                | <i>Scientific Name</i>            | <i>Count</i> |
|-----------------------------------|-----------------------------------|--------------|
| Yellow-throated Sparrow           | <i>Petronia supercilialis</i>     | 25           |
| House Sparrow                     | <i>Passer domesticus</i>          | 220          |
| Grey-headed Sparrow               | <i>Passer griseus</i>             | 29           |
| Terrestrial Bulbul                | <i>Phyllastrephus terrestris</i>  | 3            |
| Black-eyed Bulbul                 | <i>Pycnonotus nigricans</i>       | 227          |
| Tropical Boubou                   | <i>Laniarius aethiopicus</i>      | 21           |
| White-bellied Sunbird             | <i>Nectarinia talatala</i>        | 24           |
| Yellow-bellied (Variable) Sunbird | <i>Nectarinia venutsa</i>         | 3            |
| Miombo double-collared sunbird    | <i>Nectarinia manoensis</i>       | 22           |
| Black Sunbird                     | <i>Nectarinia amethystina</i>     | 51           |
| Scarlet-chested Sunbird           | <i>Nectarinia senegalensis</i>    | 13           |
| Cardinal Woodpecker               | <i>Dendropicos fuscescens</i>     | 3            |
| Golden-tailed Woodpecker          | <i>Campethera abingoni</i>        | 7            |
| Grey Lourie                       | <i>Corythaixoides concolor</i>    | 8            |
| Purple-crested Lourie             | <i>Tauraco porphyreolophus</i>    | 32           |
| Green-spotted Dove                | <i>Turtur chalcospilos</i>        | 2            |
| Cape Turtle Dove                  | <i>Streptopelia capicola</i>      | 32           |
| Laughing Dove                     | <i>streptopelia senegalensis</i>  | 238          |
| Red-eyed Dove                     | <i>Streptopelia semitorquata</i>  | 109          |
| Rock Pigeon                       | <i>Columbra guinea</i>            | 10           |
| Feral Pigeons                     | <i>Columba livia</i>              | 238          |
| Crested Barbet                    | <i>Trachyphonus viallantii</i>    | 17           |
| Whyte's Barbet                    | <i>Stactolaema whytii</i>         | 8            |
| Yellow-fronted Tinker Barbet      | <i>Pogoniuslus chrysoconus</i>    | 7            |
| Black-collared Barbet             | <i>Lybius torquatus</i>           | 9            |
| Long-billed Crombec               | <i>Sylveitta rufescens</i>        | 1            |
| Striped Kingfisher                | <i>Halcyon chelicuti</i>          | 4            |
| Greater Blue-eared Starling       | <i>Lamprotornis chalybaeus</i>    | 11           |
| Red-winged Starling               | <i>Onychognathus morio</i>        | 65           |
| Plum-coloured Starling            | <i>Cinnyricinclus leucogaster</i> | 3            |
| Arrow-marked Babbler              | <i>Turdoides jardineii</i>        | 31           |
| Lanner Falcon                     | <i>Falco biarmicus</i>            | 4            |
| Peregrine Falcon                  | <i>Falco peregrinus</i>           | 1            |
| Eastern Red-footed Falcon         | <i>Falco amurensis</i>            | 101          |
| Fiery-necked Nightjar             | <i>Caprimulgus pectoralis</i>     | 1            |
| Southern Black Tit                | <i>Parus niger</i>                | 3            |
| Lizard Buzzard                    | <i>Kaupifalco monogrammicus</i>   | 1            |
| Southern Black Flycatcher         | <i>Melaenornis pammelaina</i>     | 12           |
| Paradise Flycatcher               | <i>Terpsiphone viridis</i>        | 21           |
| Spotted Flycatcher                | <i>Muscicapa striata</i>          | 2            |
| Red-billed Woodhoopoe             | <i>Pheoniculus purpureus</i>      | 11           |
| Puffback                          | <i>Dryoscopus cubla</i>           | 39           |
| Chin-spot Batis                   | <i>Batis molitor</i>              | 3            |
| Fork-tailed Drongo                | <i>Dicrurus adsimilis</i>         | 48           |
| Greater Honeyguide                | <i>Indicator</i>                  | 4            |
| Kurrichane Thrush                 | <i>Turdus libonyana</i>           | 26           |
| Golden-breasted Bunting           | <i>Emberiza flaviventris</i>      | 1            |
| Rock Bunting                      | <i>Emberiza tahapisi</i>          | 2            |
| Brubru                            | <i>Nilaus afer</i>                | 6            |
| Yellow White-eye                  | <i>Zosterops senegalensis</i>     | 60           |
| Black-headed Oriole               | <i>Oriolus larvatus</i>           | 9            |
| Melba Finch                       | <i>Pytilia melba</i>              | 2            |
| Gabar Goshawk                     | <i>Micronisus gabar</i>           | 1            |

|                              |                                  |      |
|------------------------------|----------------------------------|------|
| Cuckoo Hawk                  | <i>Aviceda cuculoides</i>        | 1    |
| Little Banded Goshawk        | <i>Accipiter badius</i>          | 2    |
| Black Sparrowhawk            | <i>Accipiter melanoleucus</i>    | 3    |
| Little Sparrowhawk           | <i>Accipiter minullus</i>        | 6    |
| White Helmetshrike           | <i>Prionops plumatus</i>         | 28   |
| Fiscal Shrike                | <i>Lanius collaris</i>           | 2    |
| Paradise Whydah              | <i>Vidua paradisaea</i>          | 1    |
| Pin-tailed Whydah            | <i>Vidua macroura</i>            | 23   |
| Red-headed Weaver            | <i>Anaplectes rubriceps</i>      | 1    |
| Golden Weaver                | <i>Ploceus xanthrops</i>         | 4    |
| Spectacled Weaver            | <i>Ploceus ocularis</i>          | 6    |
| Southern Masked Weaver       | <i>Ploceus velatus</i>           | 83   |
| Thick-billed Weaver          | <i>Amblyospiza albifrons</i>     | 8    |
| Little Bee-eater             | <i>Merops pusillus</i>           | 5    |
| European Bee-eater           | <i>Merops apiaster</i>           | 79   |
| Grey Hornbil                 | <i>Tockus nasutus</i>            | 1    |
| Streaky-headed Canary        | <i>Serinus gularis</i>           | 23   |
| Yellow-eyed Canary           | <i>Serinus mozambicus</i>        | 55   |
| Black-eared Canary           | <i>Serinus mennelli</i>          | 12   |
| Tawnyflanked Prinia          | <i>Prinia subflava</i>           | 41   |
| Black-breasted Snake Eagle   | <i>Circaetus gallicus</i>        | 3    |
| African Fish Eagle           | <i>Haliaeetus vocifer</i>        | 2    |
| Long-crested Eagle           | <i>Lophaetus occipitalis</i>     | 3    |
| Wahlberg's Eagle             | <i>Aquila wahlbergi</i>          | 3    |
| Eastern Saw-wing Swallow     | <i>Psalidoprocne orientalis</i>  | 1    |
| European Swallow             | <i>Hirundo rustica</i>           | 231  |
| Grey-rumped Swallow          | <i>Pseudhirundo griseopyga</i>   | 11   |
| Red-breasted Swallow         | <i>Hirundo semirufa</i>          | 3    |
| Wire-tailed Swallow          | <i>Hirundo smithii</i>           | 8    |
| Palm Swift                   | <i>Cypsiurus parvus</i>          | 391  |
| Little Swift                 | <i>Apus affinis</i>              | 393  |
| Neddicky                     | <i>Cisticola fulvicapilla</i>    | 1    |
| Wood Owl                     | <i>Strix woodfordii</i>          | 2    |
| Marsh Owl                    | <i>Asio capensis</i>             | 2    |
| Grey-backed Bleating Warbler | <i>Camaroptera brevicaudata</i>  | 8    |
| Willow Warbler               | <i>Phylloscopus trochilus</i>    | 25   |
| Great Reed Warbler           | <i>Acrocephalus arundinaceus</i> | 1    |
| Senegal Coucal               | <i>Centropus senegalensis</i>    | 2    |
| Hueglin's Robin              | <i>Cossypha heuglini</i>         | 11   |
| Kurrichane Buttonquail       | <i>Turnix sylvatica</i>          | 6    |
| Reed Cormorant               | <i>Phalacrocorax africanus</i>   | 1    |
| Black-crowned Tchagra        | <i>Tchagra senegala</i>          | 5    |
| Hamerkop                     | <i>Scopus umbretta</i>           | 1    |
| Jameson's Firefinch          | <i>Lagonosticta rhodopareia</i>  | 17   |
| Cattle Egret                 | <i>Bubulcus ibis</i>             | 10   |
| Bronze Mannikin              | <i>Spermestes cuculatus</i>      | 145  |
| Common Waxbill               | <i>Estrilda astrild</i>          | 43   |
| Orange-breasted Waxbill      | <i>Sporaeginthus subflavus</i>   | 22   |
| Blue Waxbill                 | <i>Uraeginthus angolensis</i>    | 38   |
| Red Bishop                   | <i>Euplectes orix</i>            | 365  |
| Yellow-backed Widow          | <i>Euplectes macrourus</i>       | 57   |
| Red-collared Widow           | <i>Euplectes ardens</i>          | 18   |
| Yellow-rumped Widow          | <i>Euplectes capensis</i>        | 15   |
| Red-billed Quelea            | <i>Quelea</i>                    | 1631 |
| Swainson's Francolin         | <i>Francolinus afer</i>          | 12   |
| Stonechat                    | <i>Saxicola torquata</i>         | 5    |

---

|                          |                                 |     |
|--------------------------|---------------------------------|-----|
| Helmeted Guineafowl      | <i>Numida meleagris</i>         | 8   |
| Chirping Cisticola       | <i>Cisticola pipiens</i>        | 7   |
| Croaking Cisticola       | <i>Cisticola natalensis</i>     | 1   |
| Levaillant's Cisticola   | <i>Cisticola tinniens</i>       | 11  |
| Rattling Cisticola       | <i>Cisticola chiniana</i>       | 15  |
| Rufous-naped Lark        | <i>Mirafra africana</i>         | 1   |
| Steelblue Widowfinch     | <i>Vidua chalybeata</i>         | 20  |
| Yellow-throated Longclaw | <i>Macronyx croceus</i>         | 8   |
| Pink-throated Longclaw   | <i>Macronyx ameliae</i>         | 2   |
| Black-headed Heron       | <i>Ardea melanocephala</i>      | 15  |
| Sacred Ibis              | <i>Threskiornis aethiopicus</i> | 11  |
| Black-shouldered Kite    | <i>Elanus caeruleus</i>         | 4   |
| Speckled Mousebird       | <i>Colius striatus</i>          | 12  |
| Pied Crow                | <i>Corvus albus</i>             | 227 |
| Yellow wagtail           | <i>Motacilla flava</i>          | 3   |
| Jacobin Cuckoo           | <i>Clamator jacobinus</i>       | 1   |
| Diederik Cuckoo          | <i>Chrysococcyx caprius</i>     | 1   |
| Black Cuckooshrike       | <i>Campephaga flava</i>         | 1   |
| African Cuckoo           | <i>Cuculus gularis</i>          | 1   |
| Common Sandpiper         | <i>Tringa hypoleucos</i>        | 1   |
| Abdim Stock              | <i>Ciconia abdimii</i>          | 25  |

---

451

452

453

454

455 **Possible Reviewers**

- 456 1. Seth Mago, Director, Urban Wildlife Institute, Lincoln Park Zoo, email  
457 SMagle@lpzoo.org
- 458 2. Wendy McWilliam, Senior Lecturer, Lincoln University, NZ, email  
459 Wendy.McWilliam@lincoln.ac.nz
- 460 3. Amanda D Rodwald, Professor; Director of Conservation Science, Cornell Lab of  
461 Ornithology, arodewald@cornell.edu

462



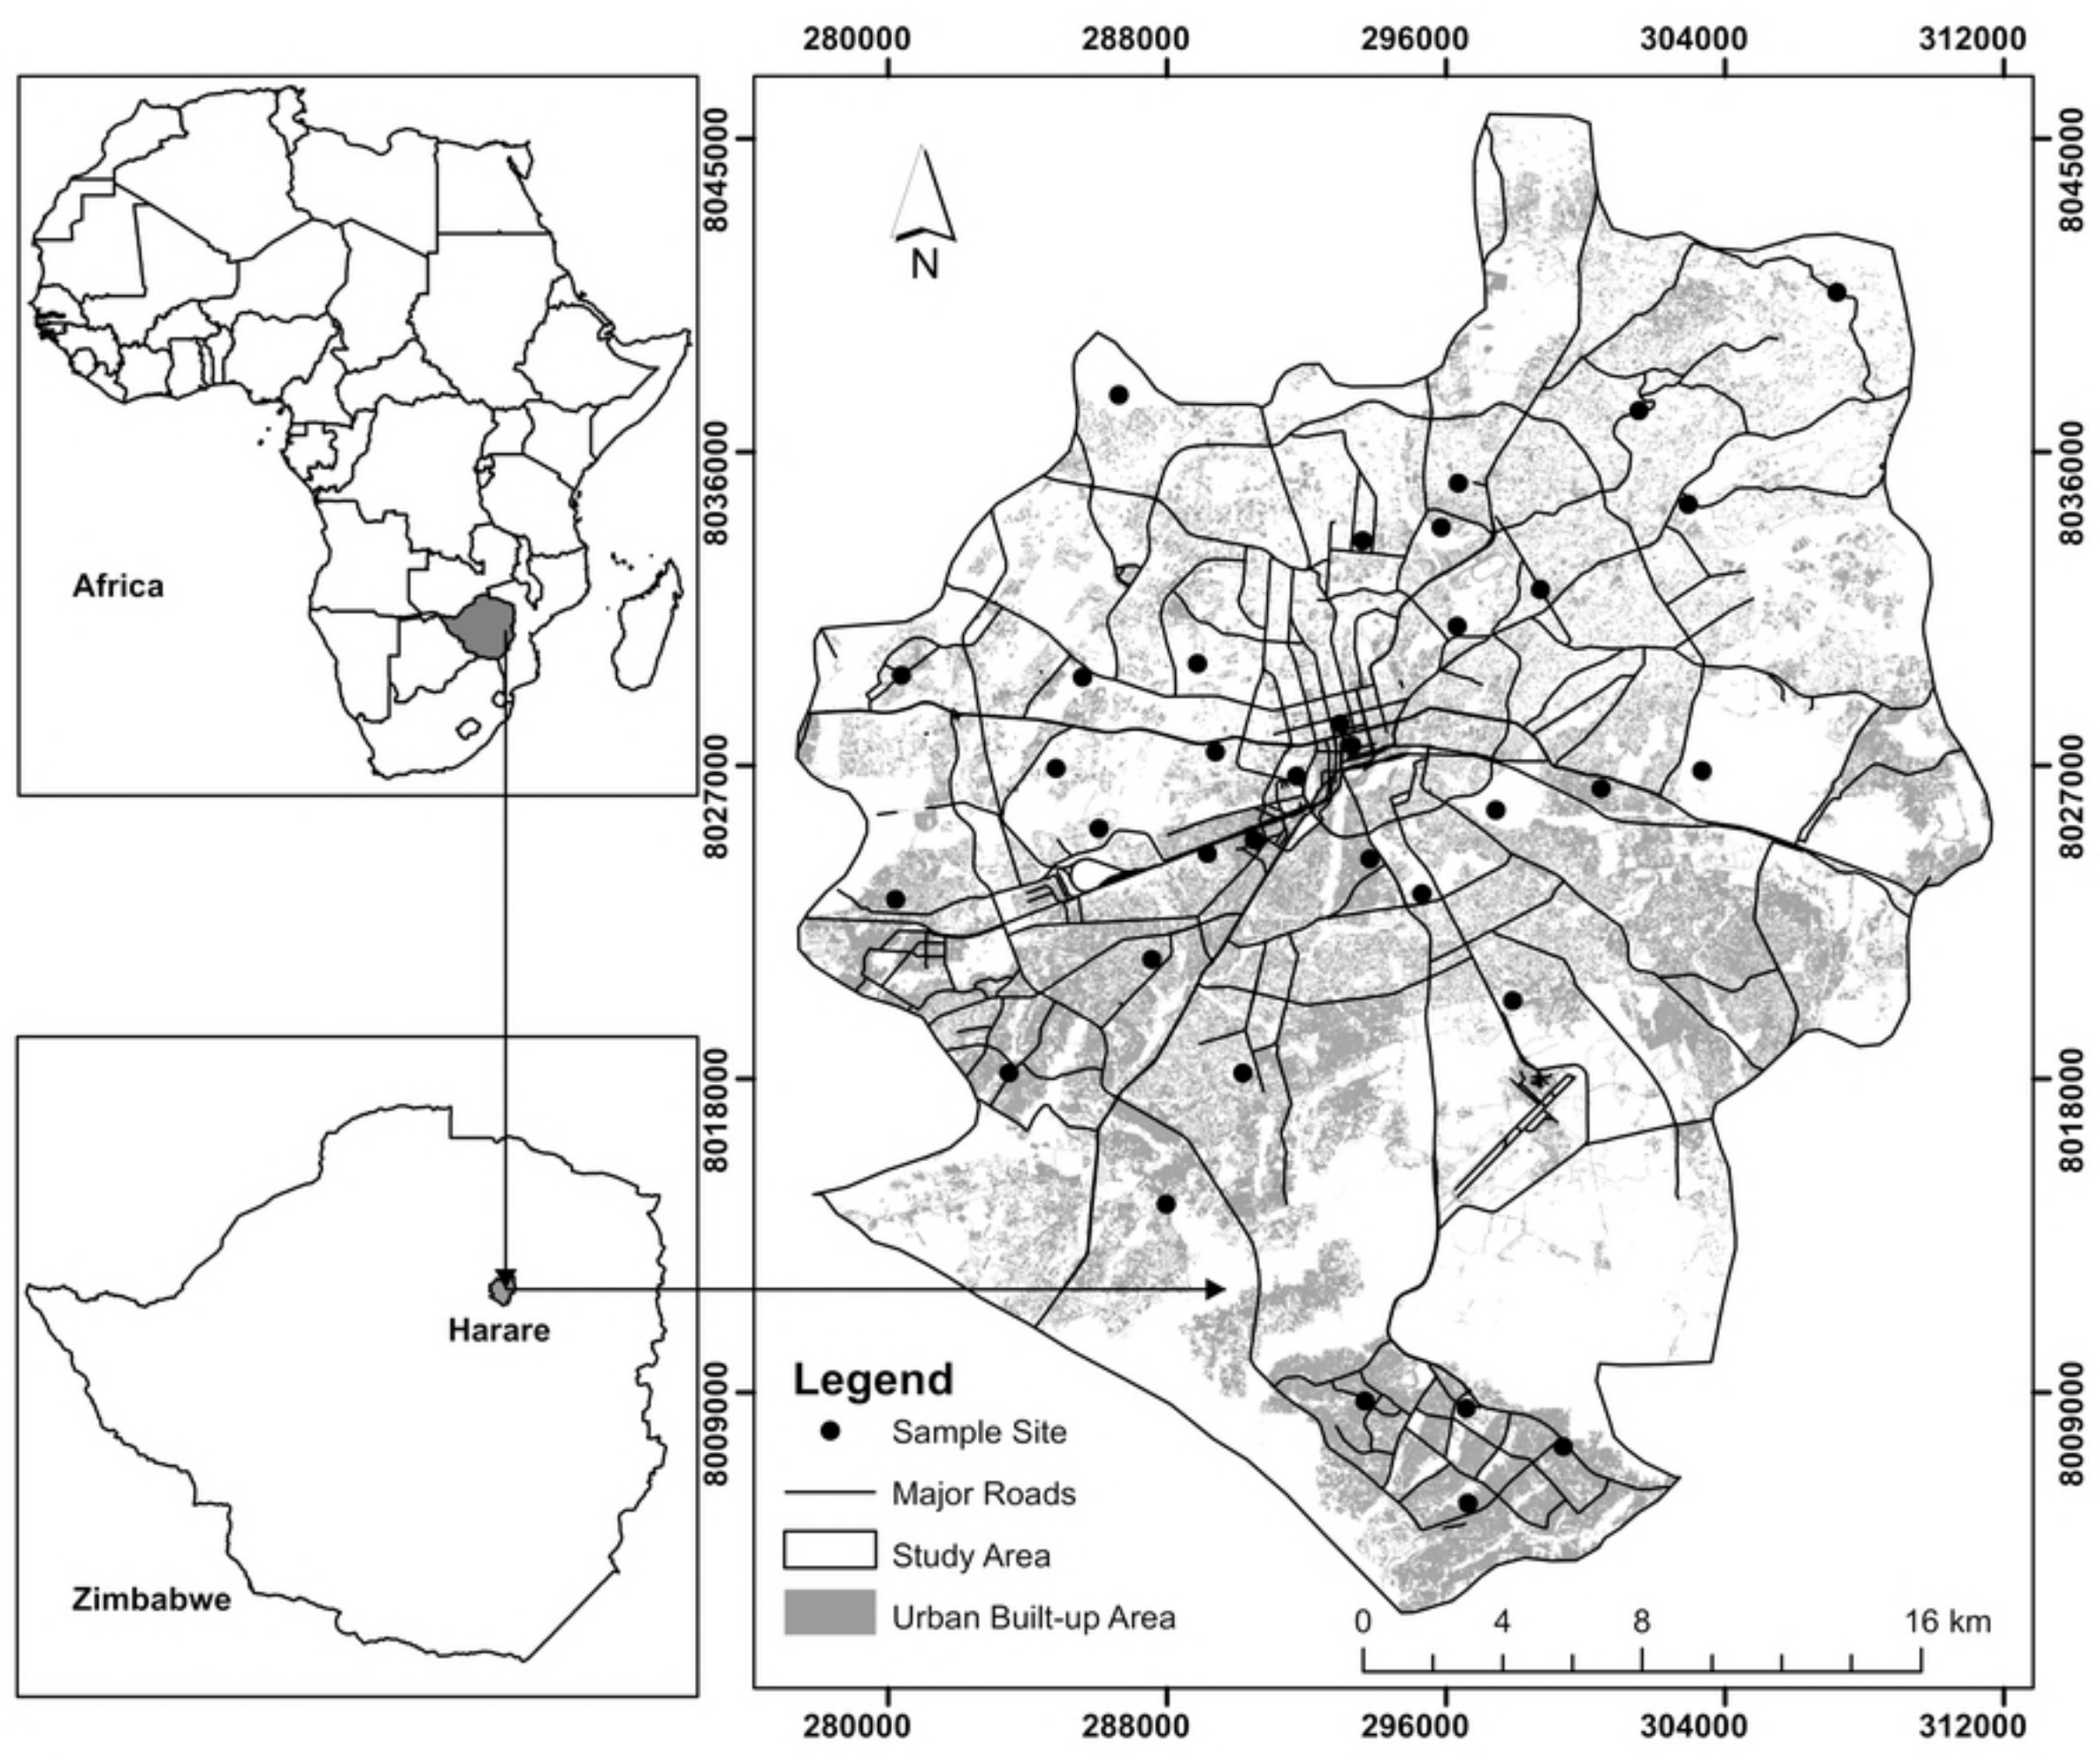

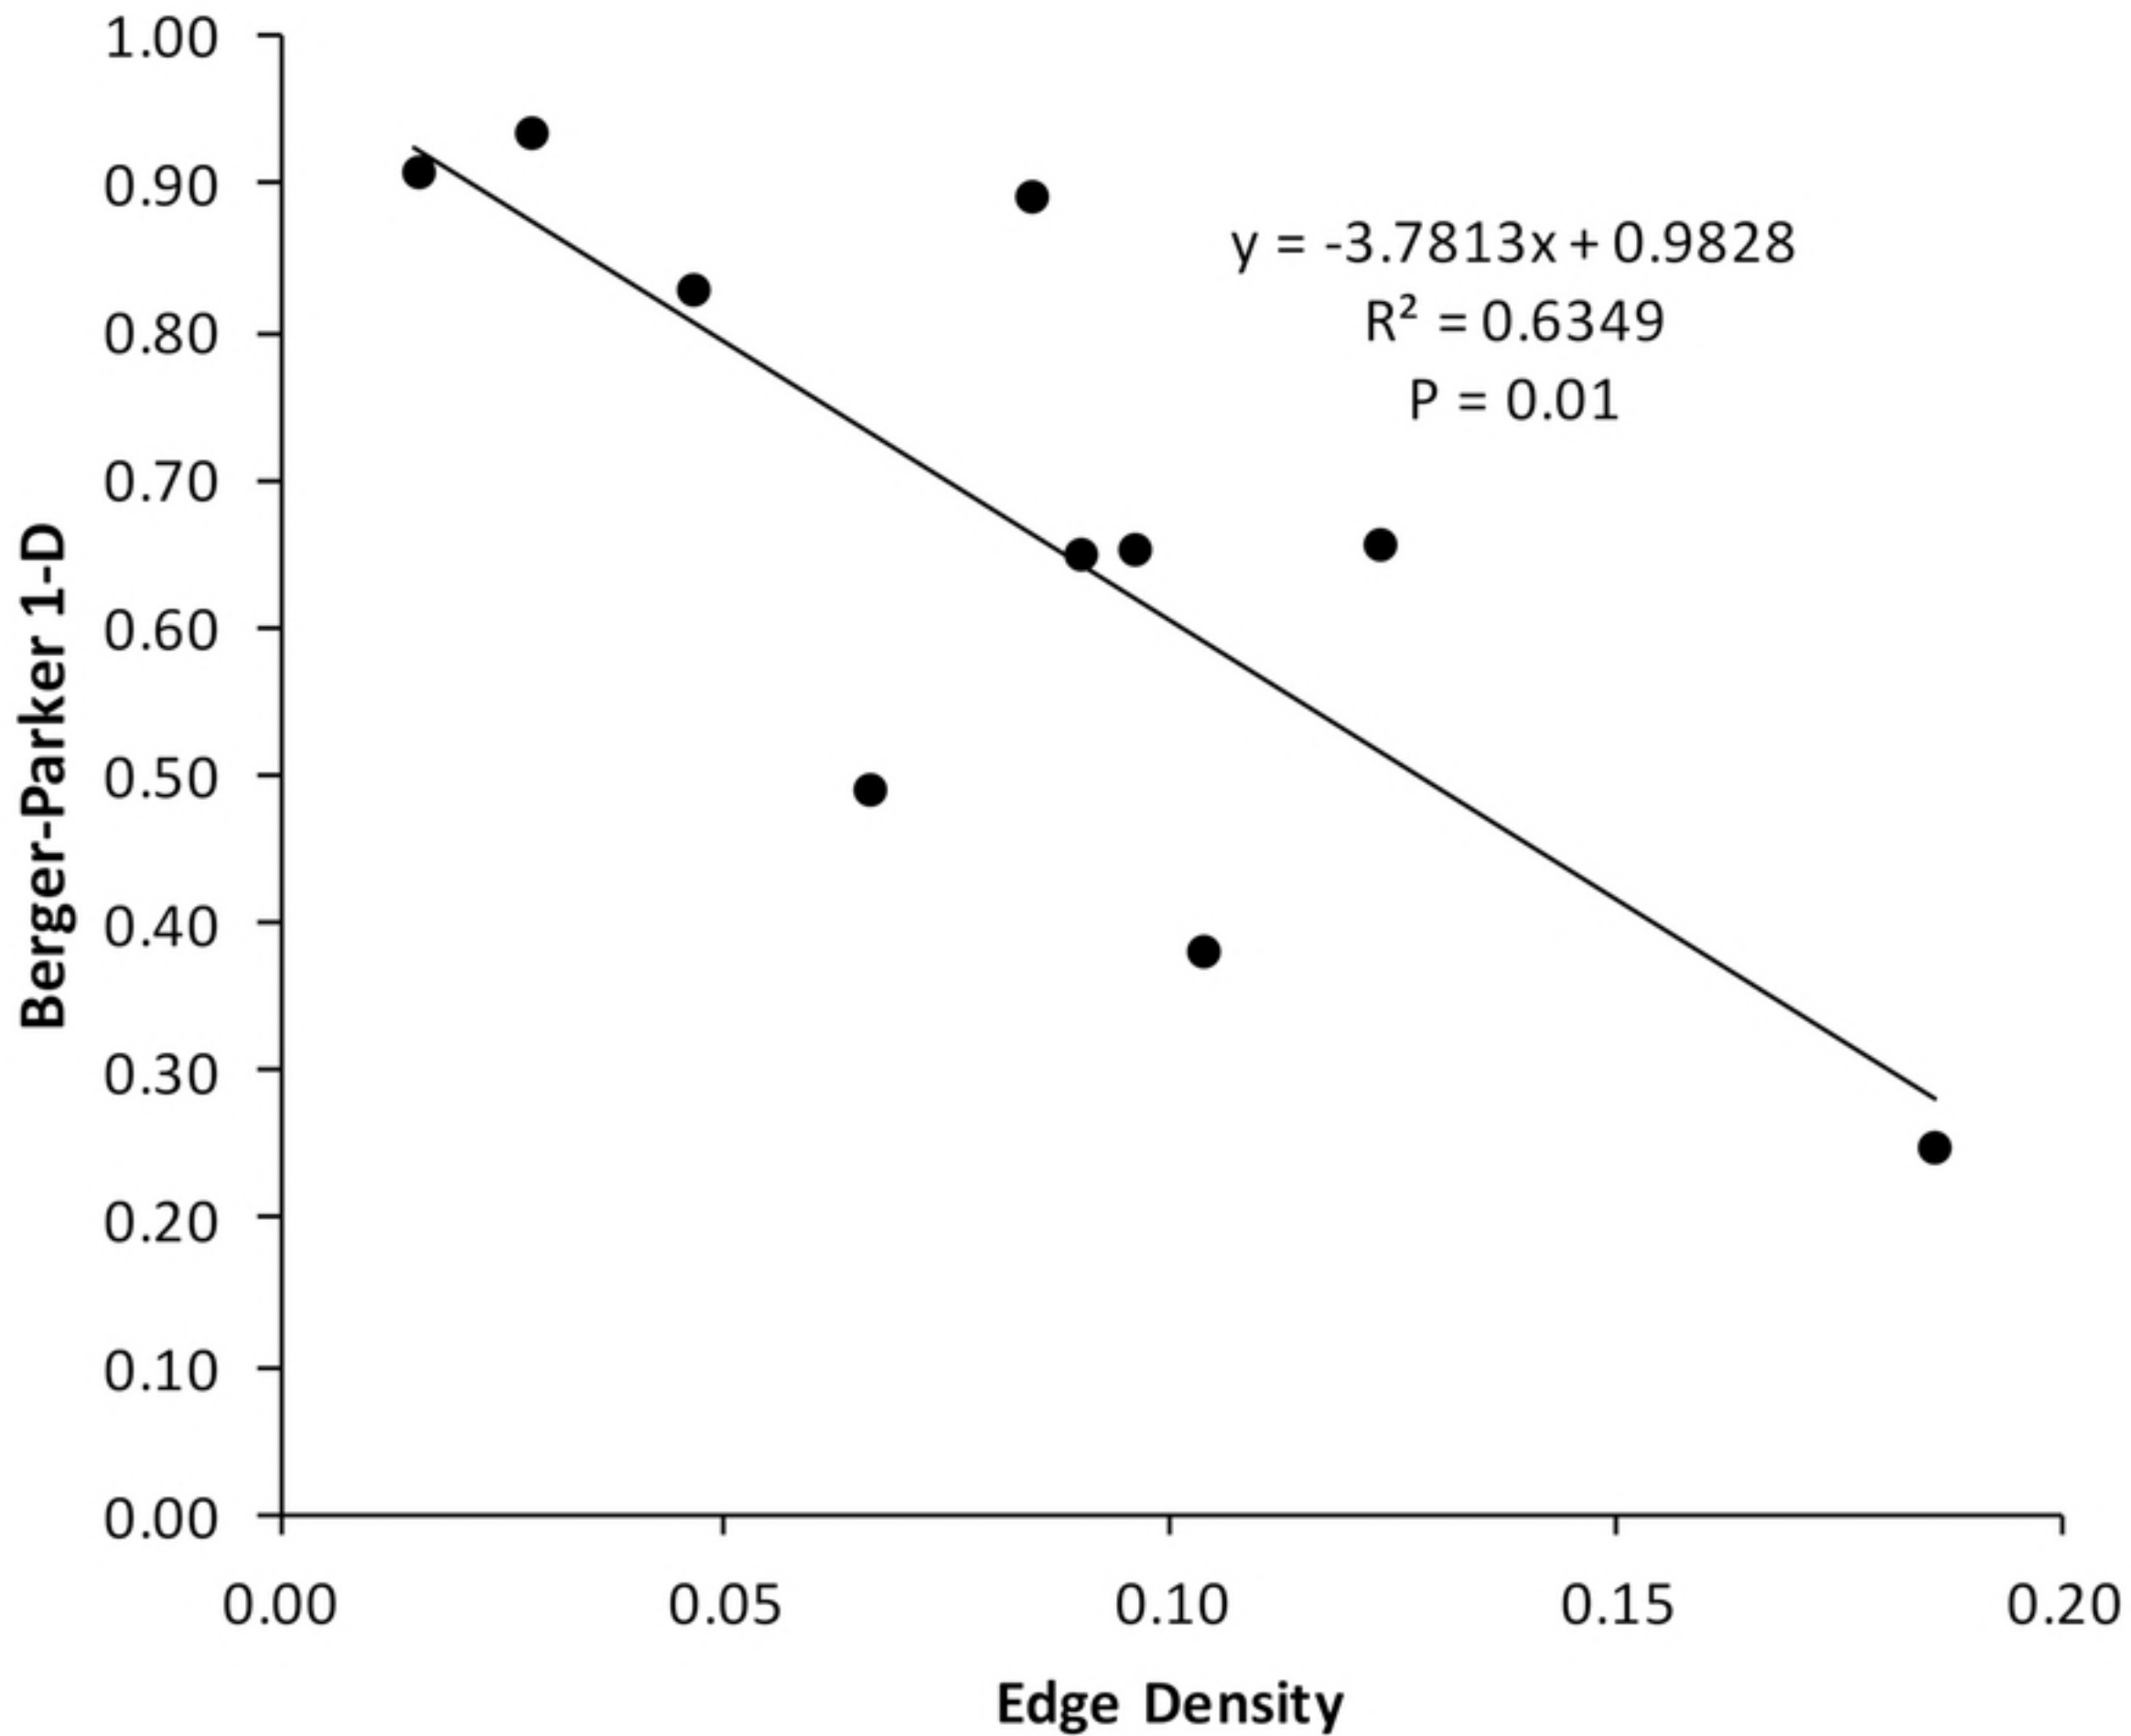

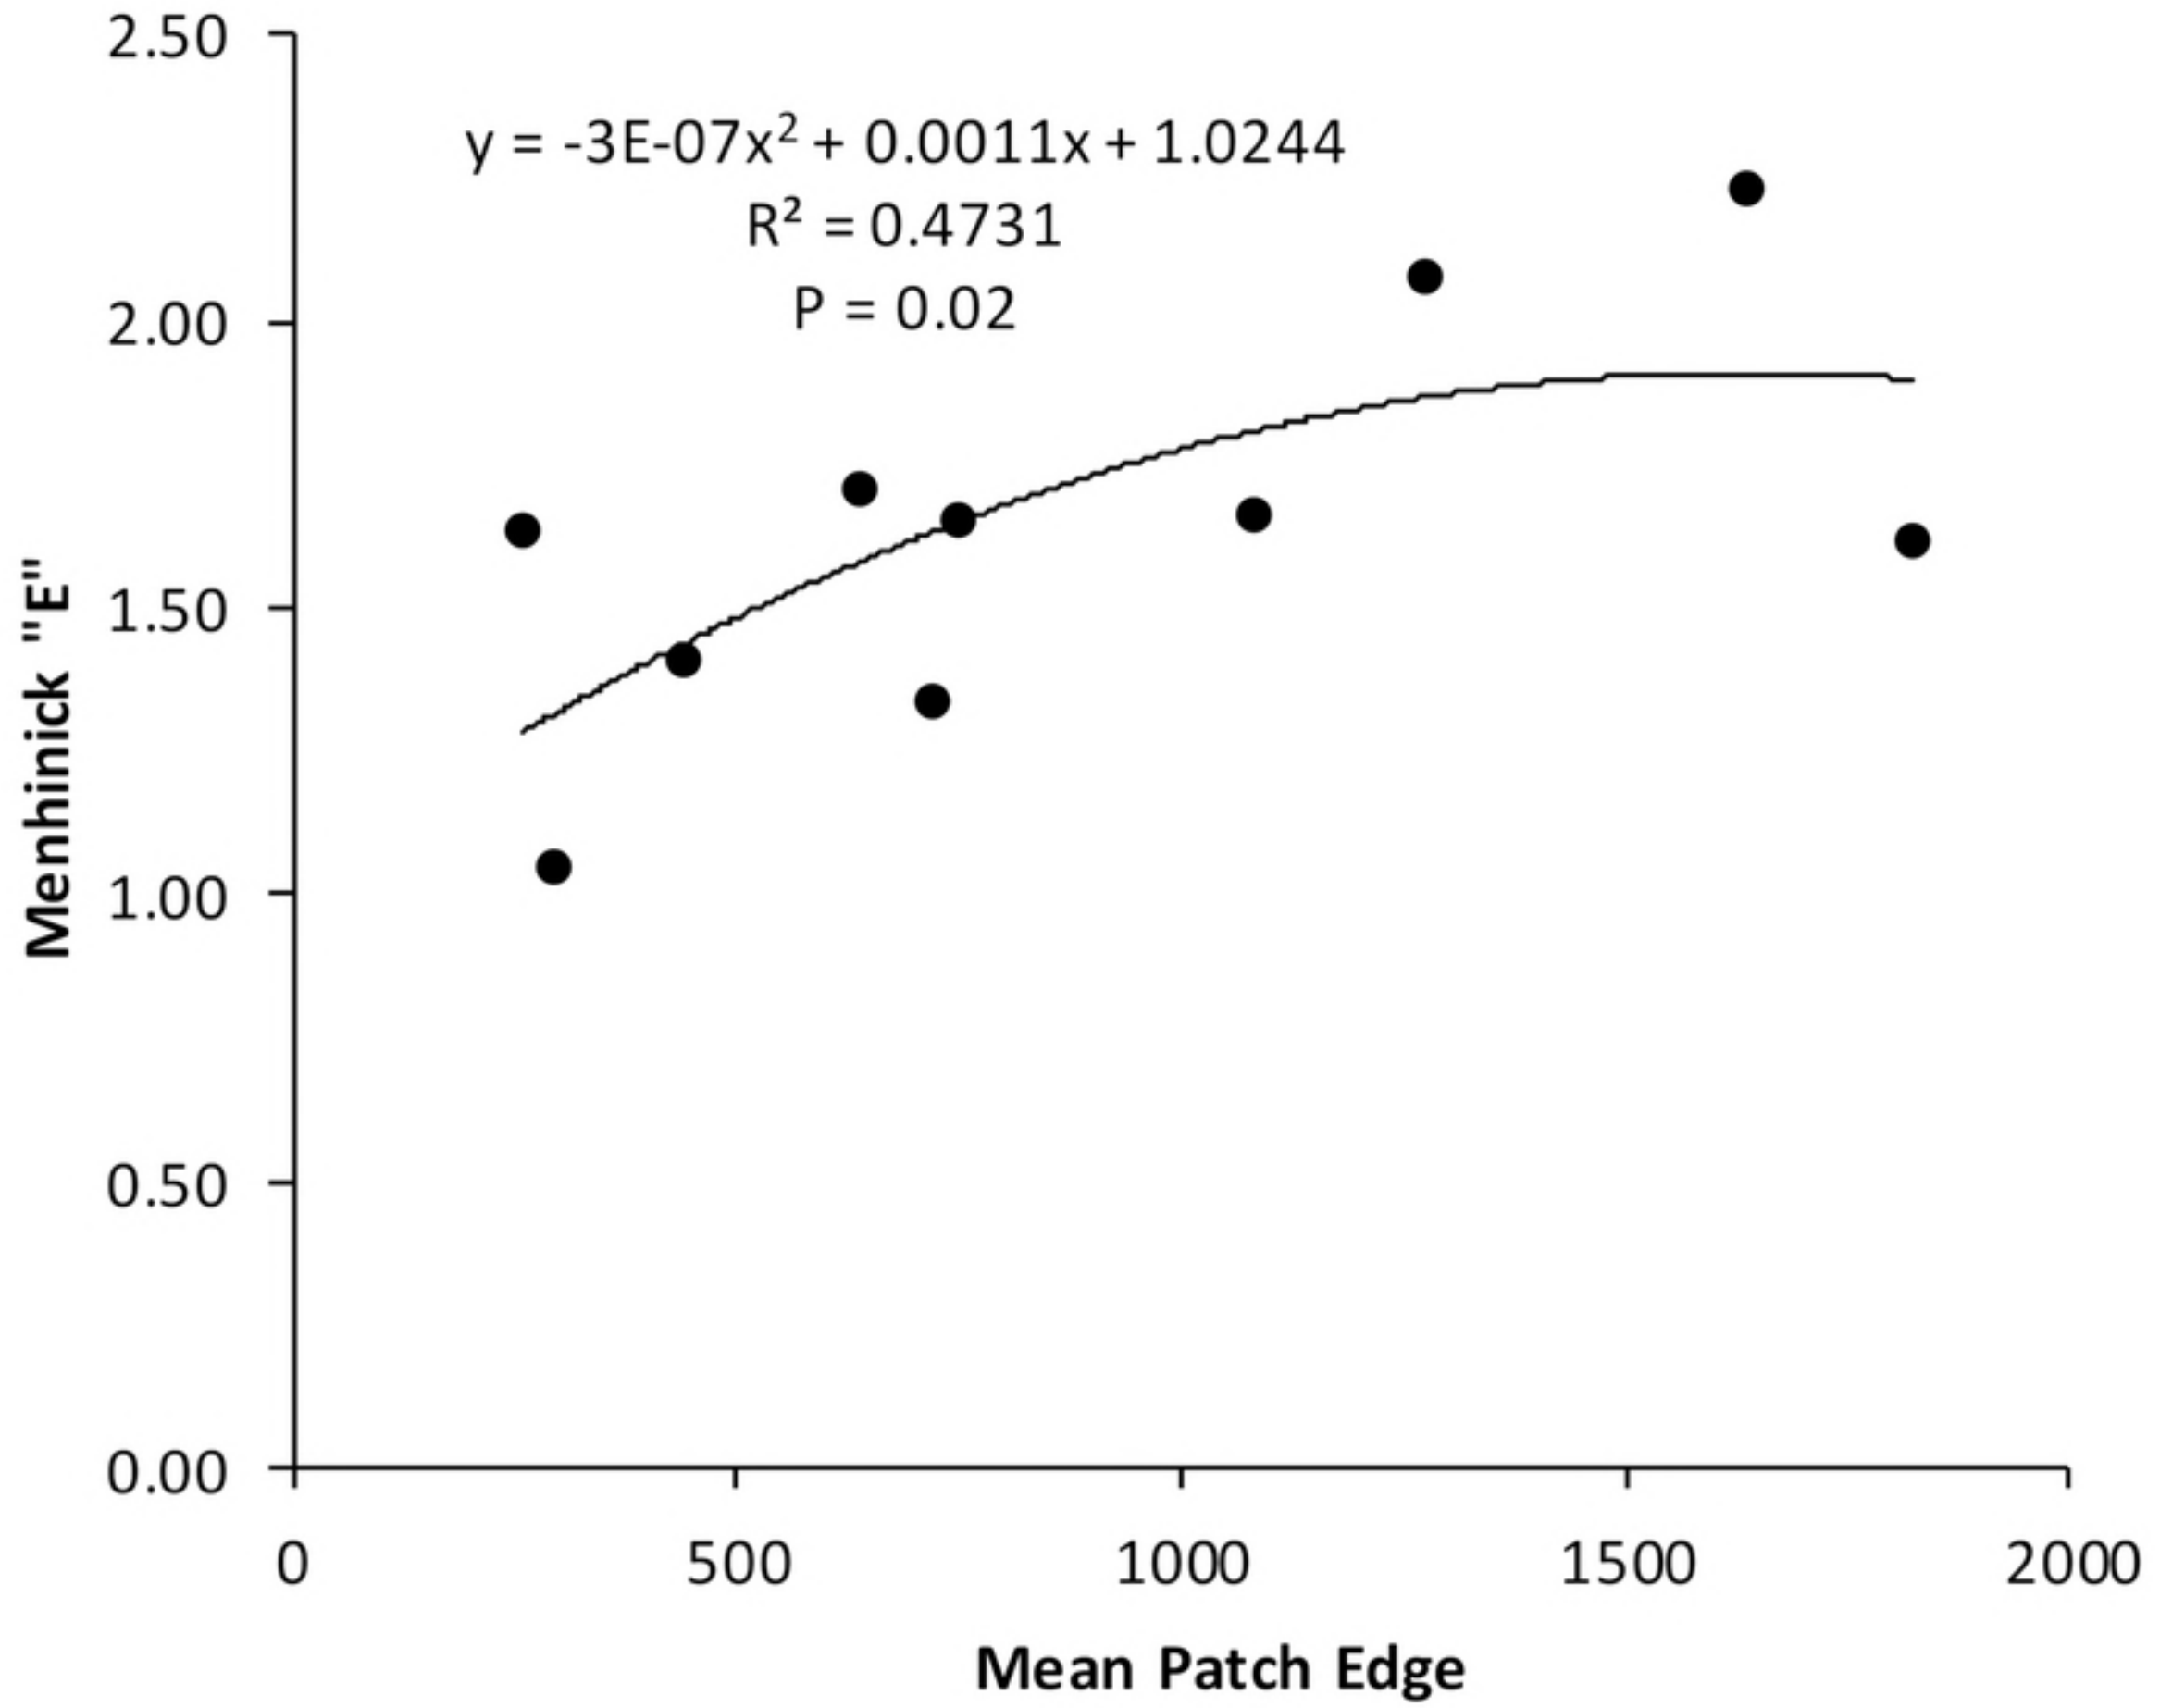

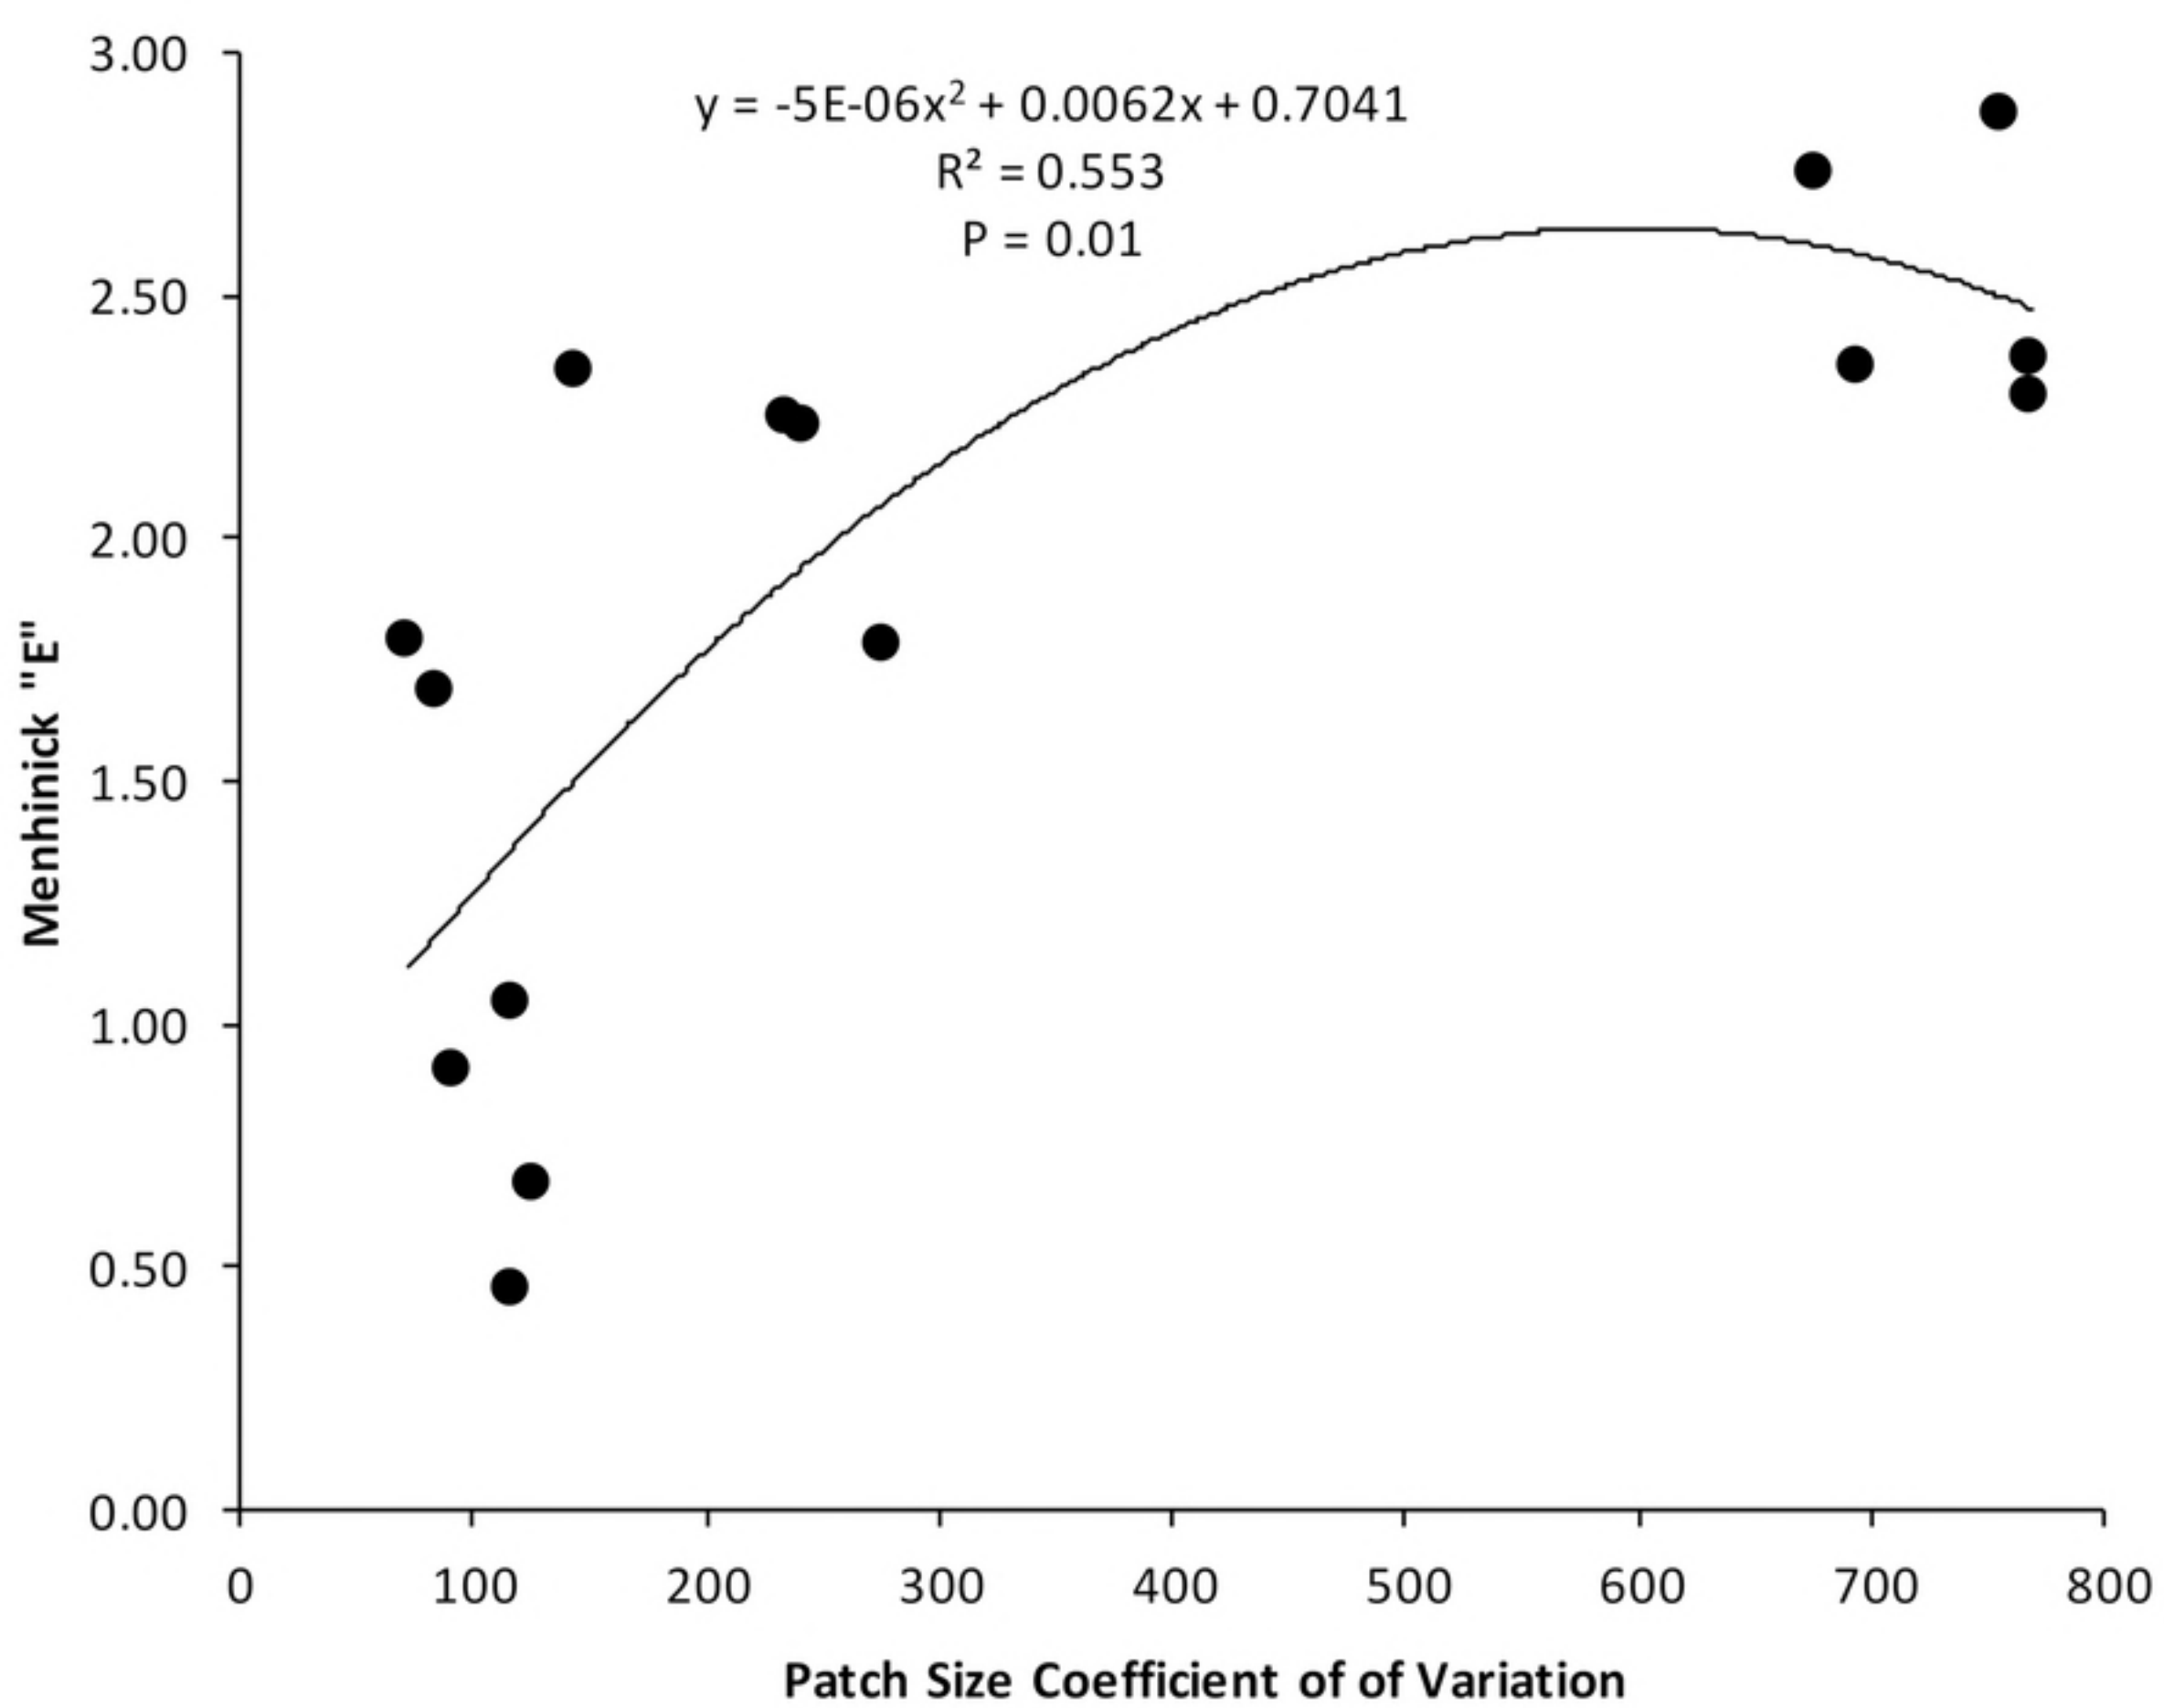

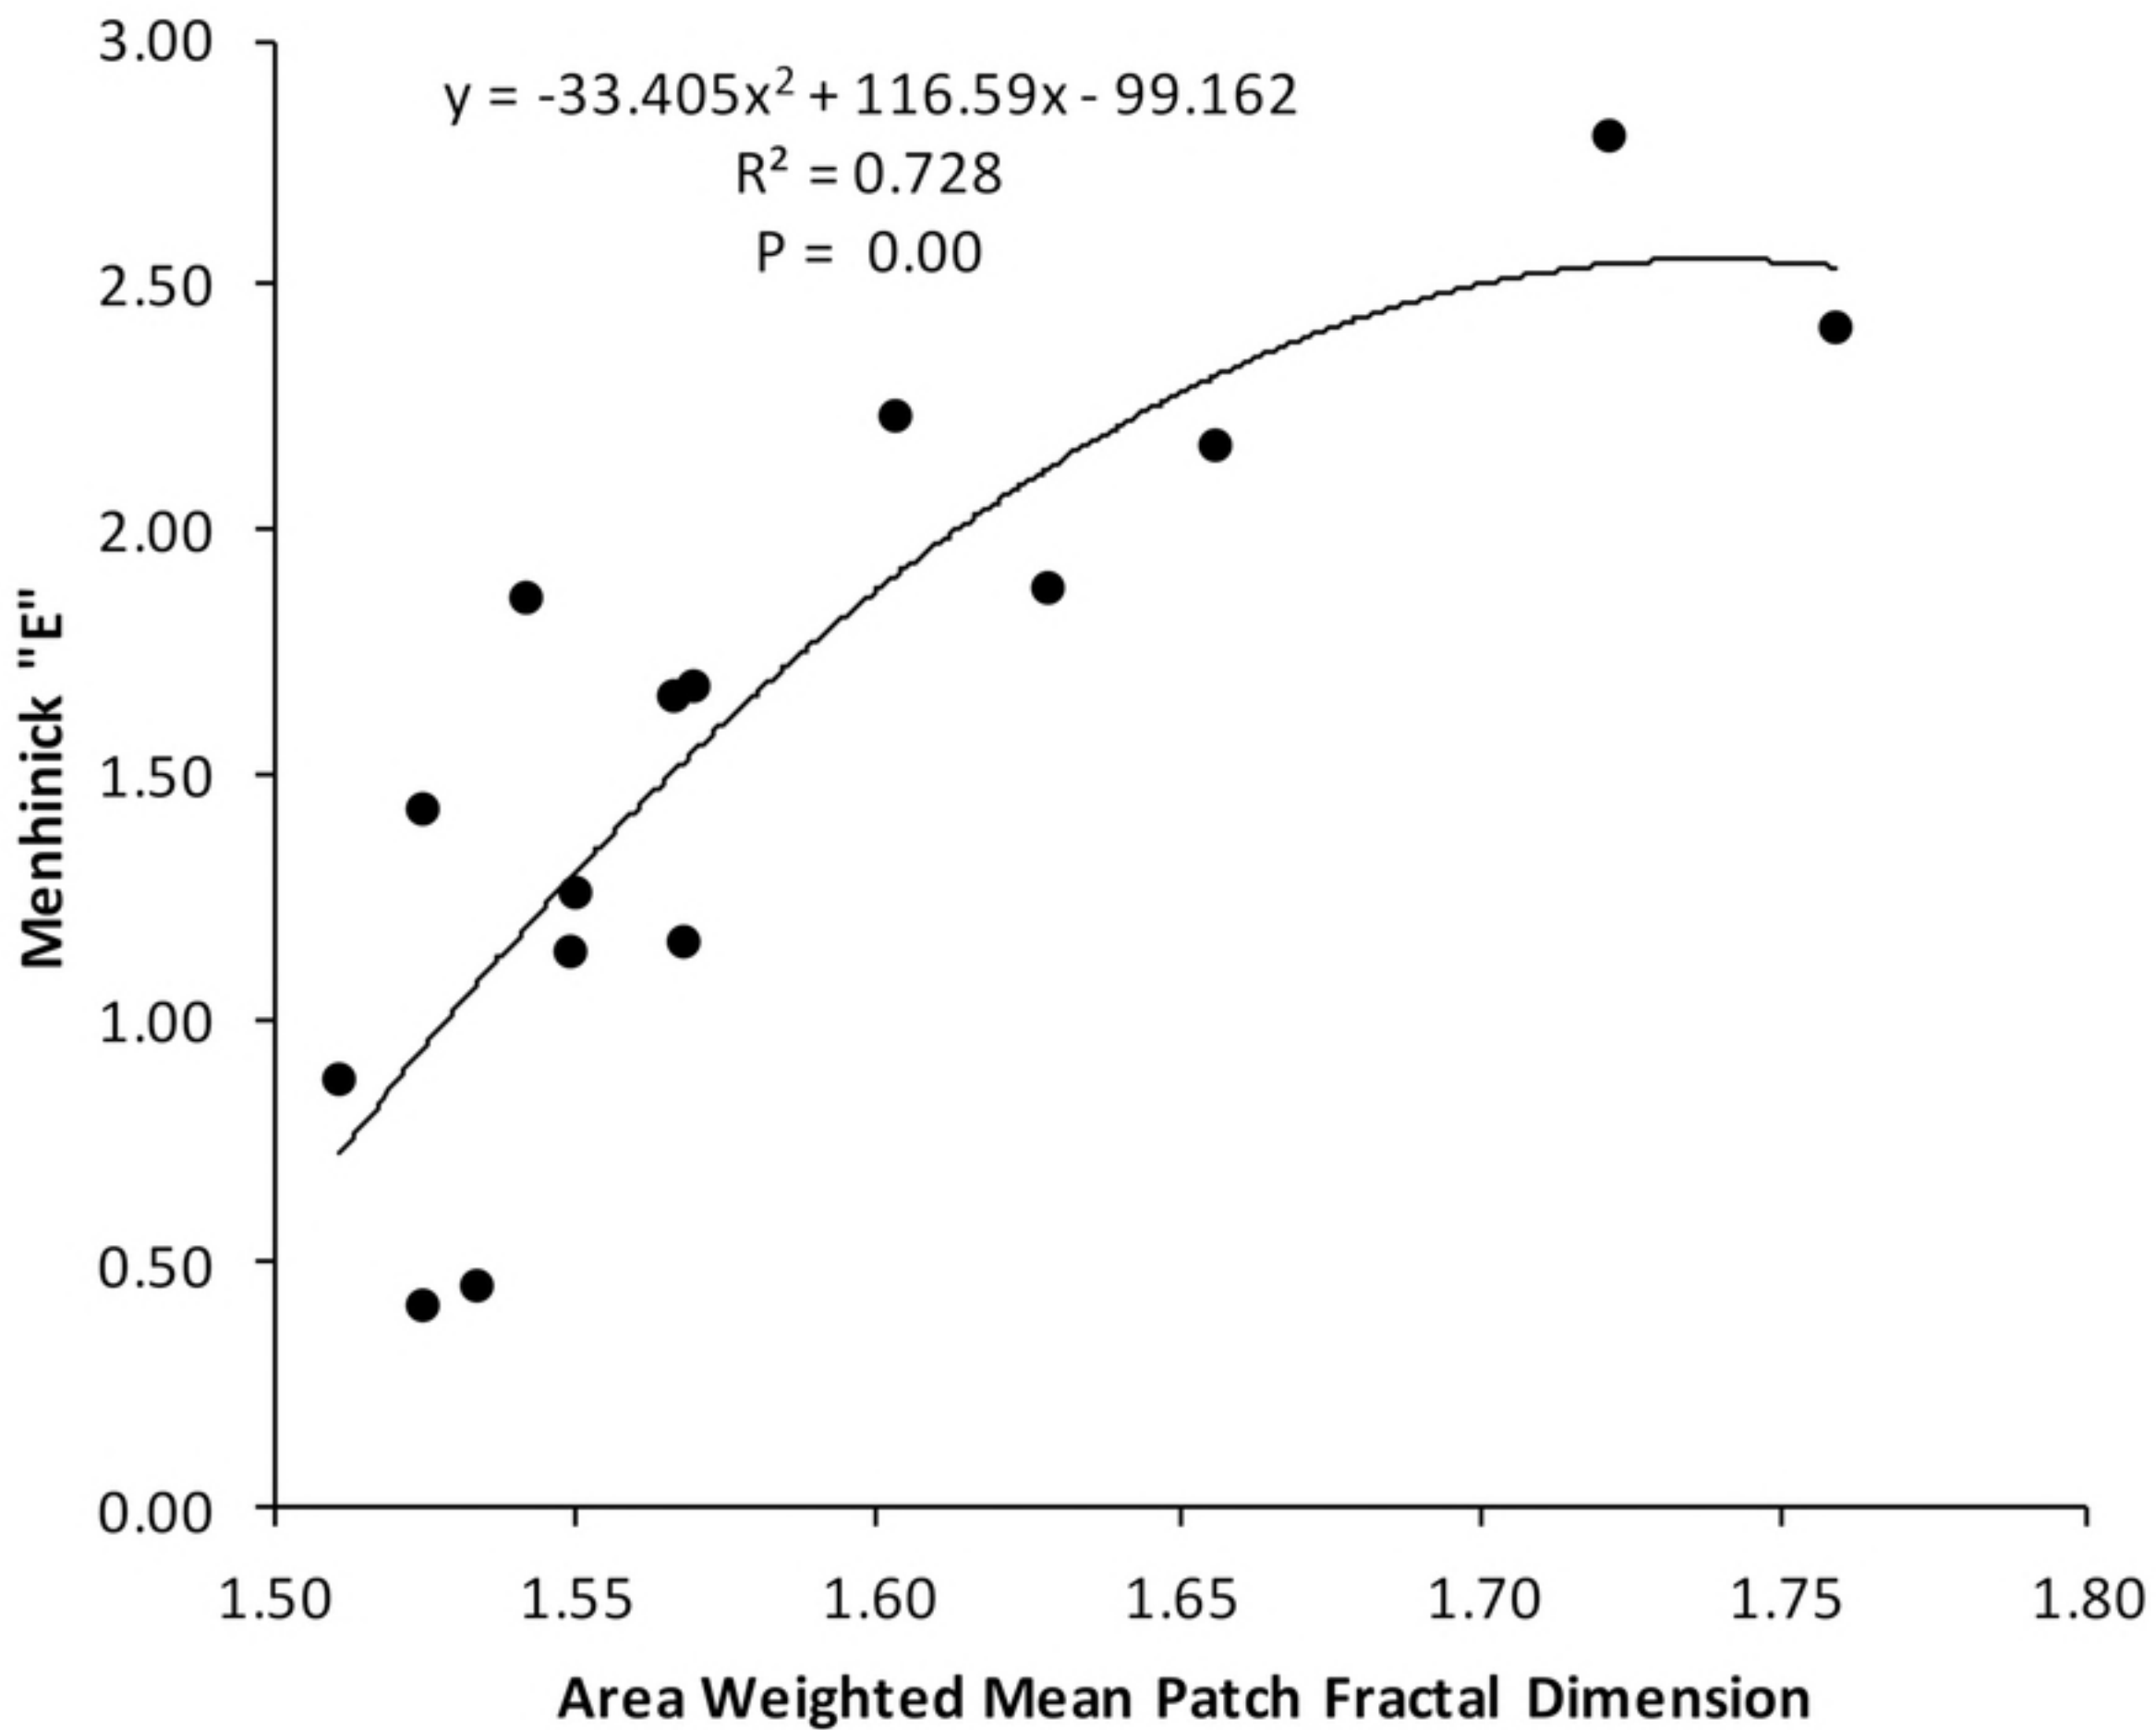

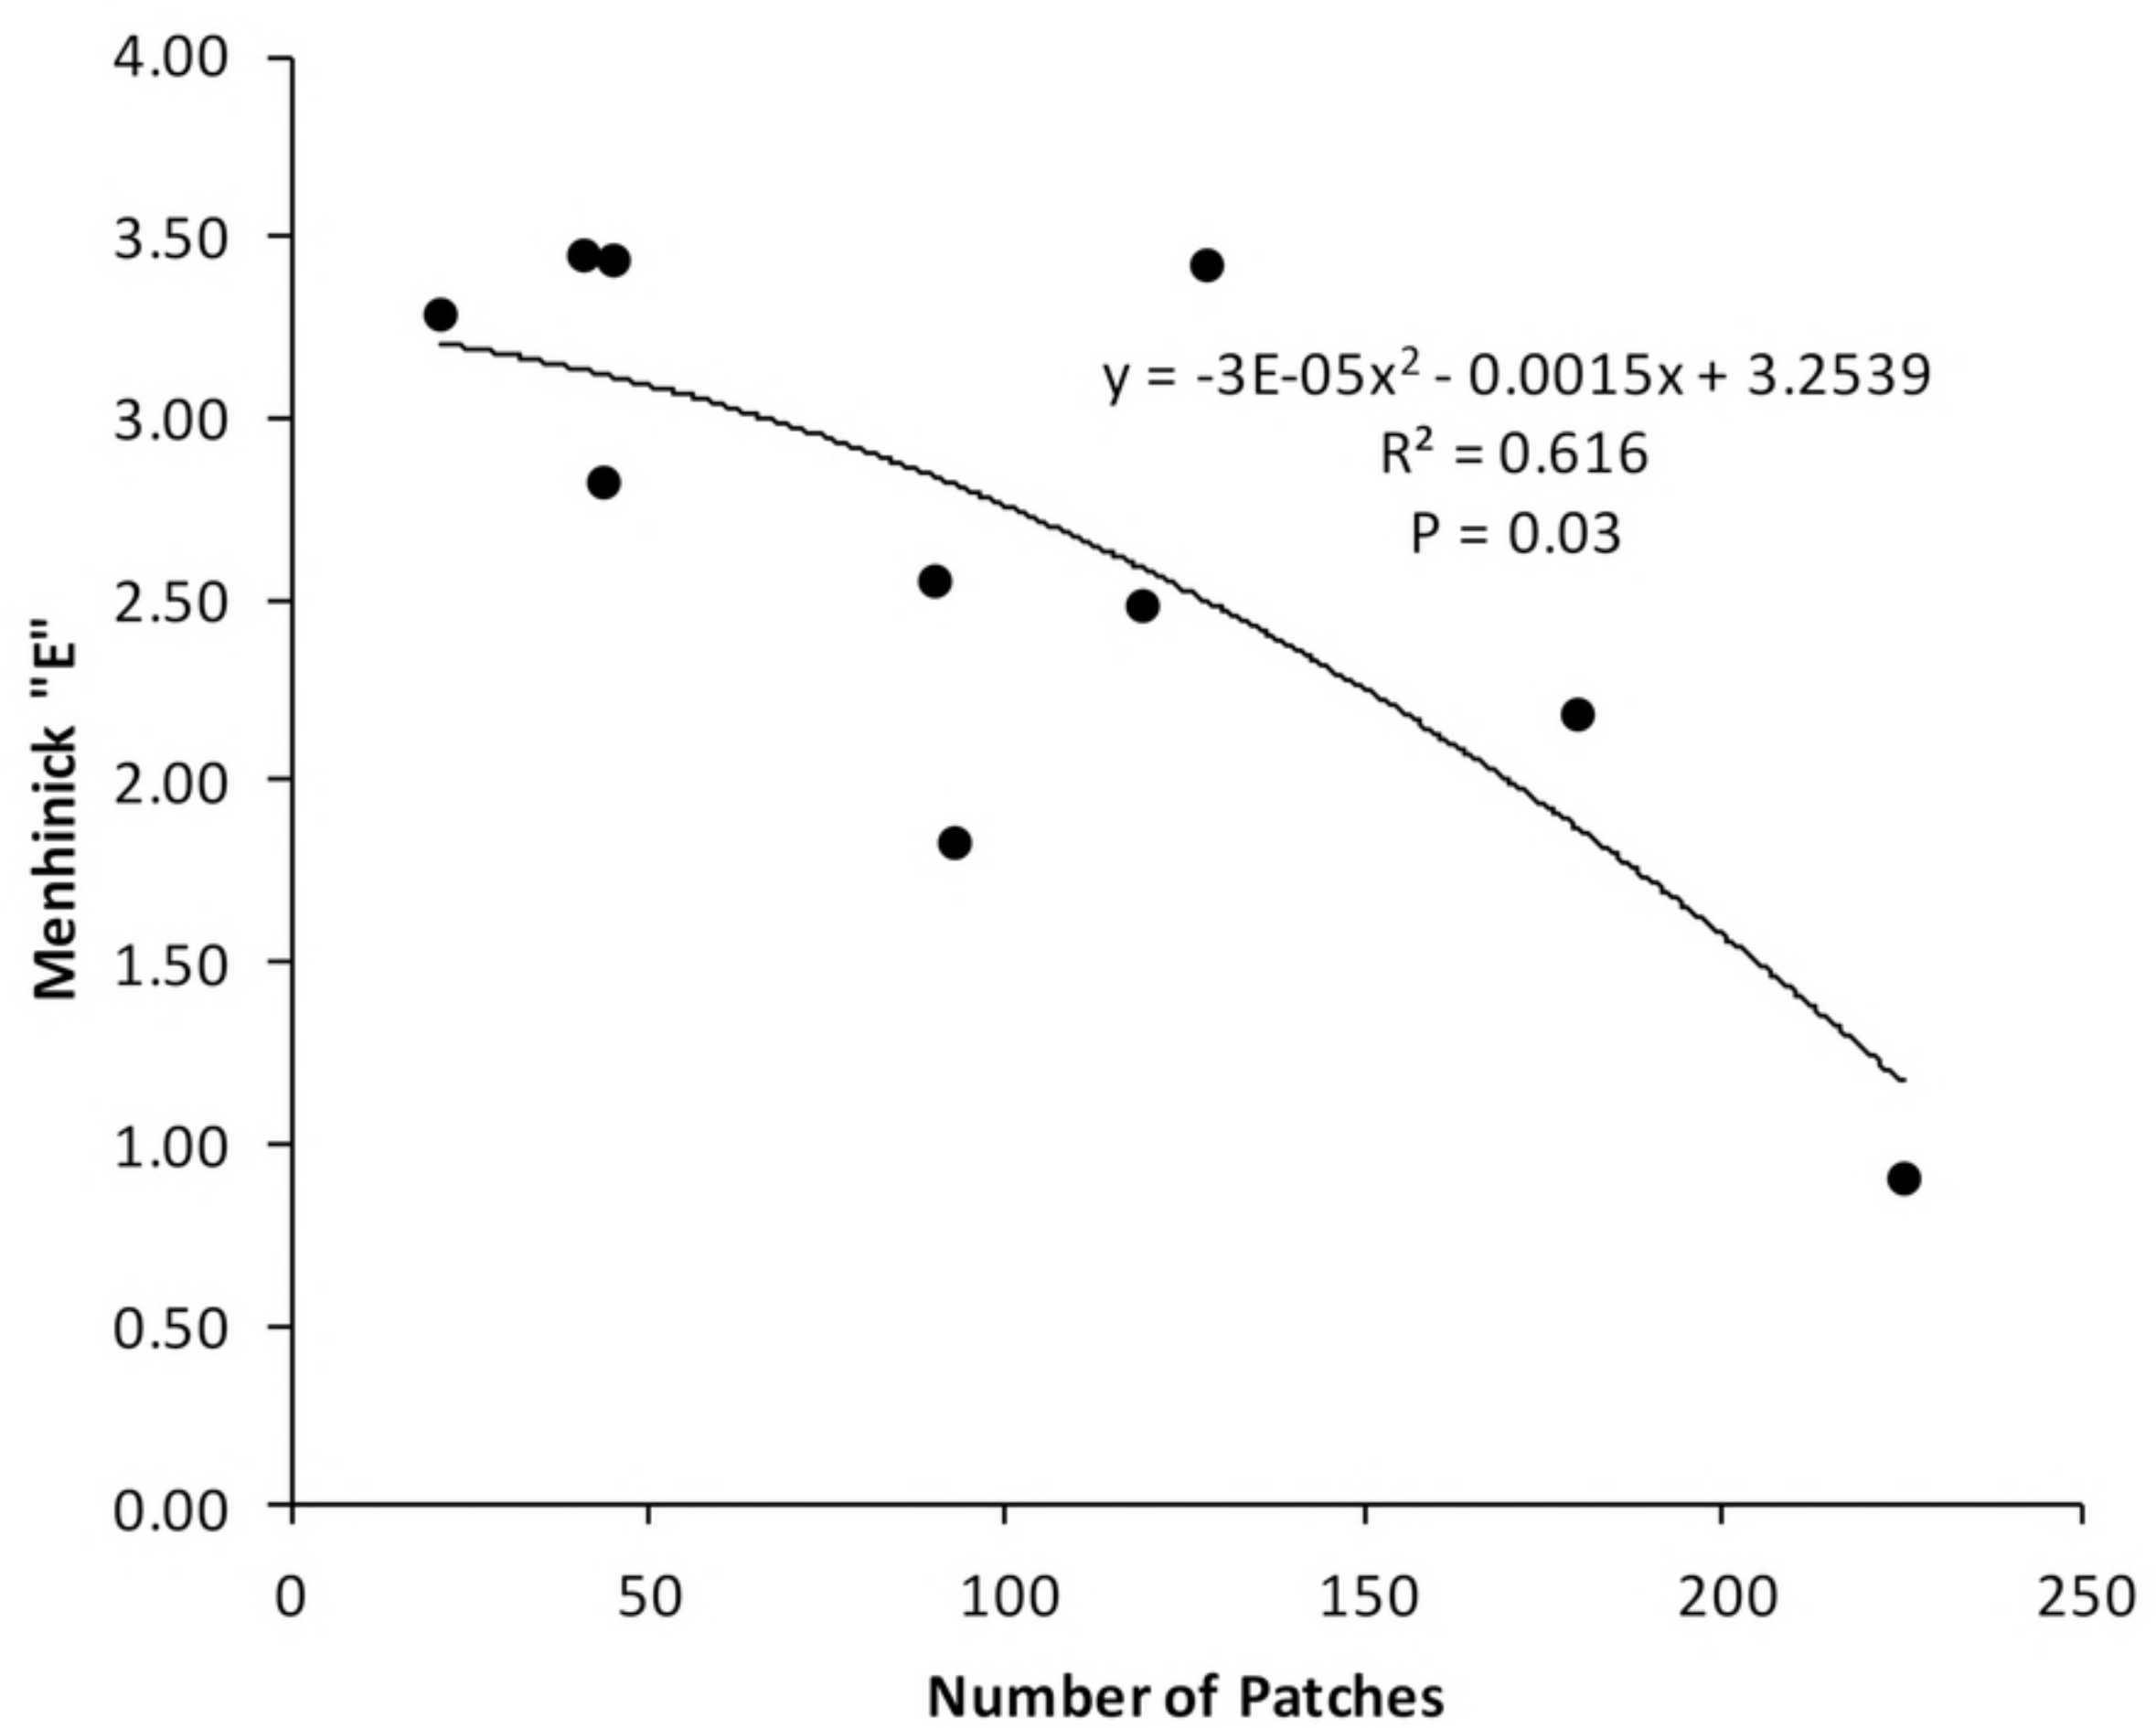

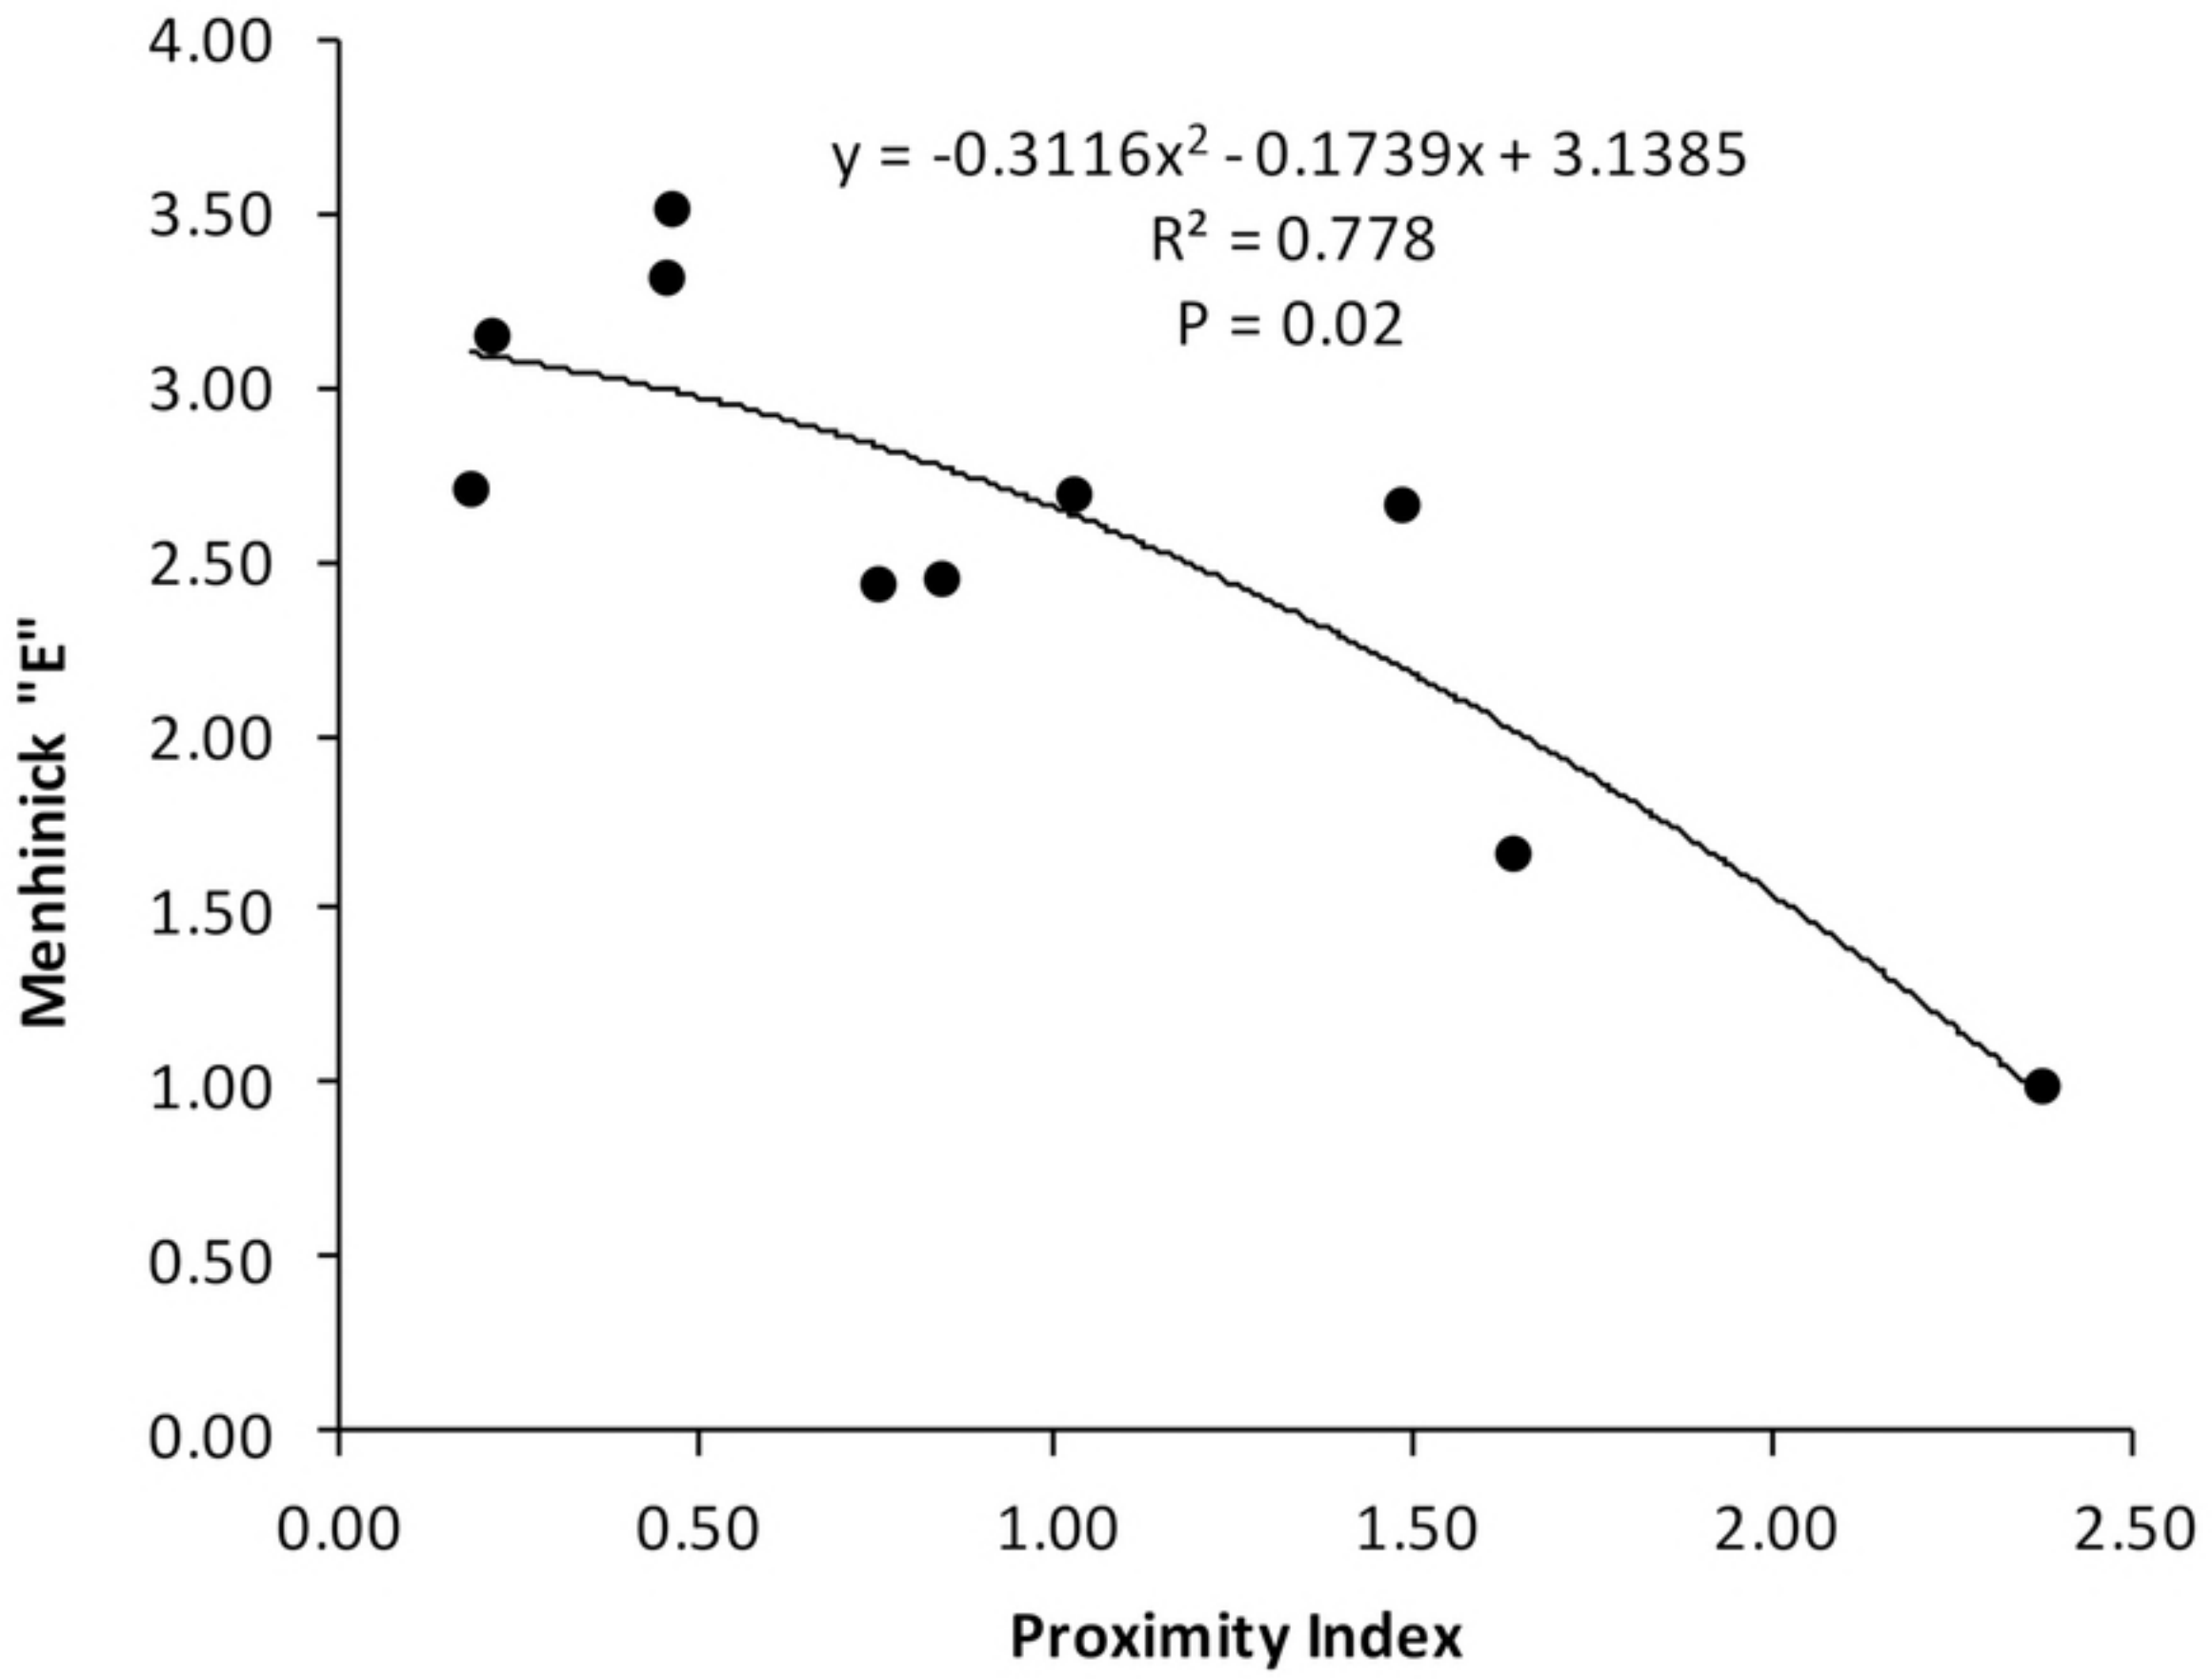

Source: https://www.biorxiv.org/content/10.1101/388702v1.full.pdf
